# Tracing the evolution of human gene regulation and its association with shifts in environment

Laura L. Colbran<sup>1,2</sup>, Maya R. Johnson<sup>3</sup>, Iain Mathieson<sup>2</sup>, and John A. Capra<sup>1,4,5</sup>

<sup>1</sup>Vanderbilt Genetics Institute, Vanderbilt University Medical Center, Nashville, TN, USA.

<sup>2</sup>Department of Genetics, Perelman School of Medicine, University of Pennsylvania, Philadelphia, PA, USA.

<sup>3</sup>School for Science and Math at Vanderbilt, Vanderbilt University, Nashville TN, USA.

<sup>4</sup>Departments of Biological Sciences and Biomedical Informatics, Vanderbilt University, Nashville TN, USA.

<sup>5</sup>Bakar Computational Health Sciences Institute and Department of Epidemiology and Biostatistics, University of California, San Francisco, USA.

## Abstract

As humans spread throughout the world, they adapted to variation in many environmental factors, including climate, diet, and pathogens. Because many of these adaptations were likely mediated by multiple non-coding variants with small effects on gene regulation, it has been difficult to link genomic signals of selection to specific genes, and to describe the regulatory response to selection. To overcome this challenge, we adapted PrediXcan, a machine learning method for imputing gene regulation from genotype data, to analyze low-coverage ancient human DNA (aDNA). First, we used simulated genomes to benchmark strategies for adapting gene regulatory prediction to increase robustness to incomplete aDNA data. Applying the resulting models to 490 ancient Eurasians, we found that genes with the strongest divergent regulation among ancient populations with hunter-gatherer, pastoralist, and agricultural lifestyles are enriched for metabolic and immune functions. Next, we explored the contribution of divergent gene regulation to two traits with strong evidence of recent adaptation: dietary metabolism and skin pigmentation. We found enrichment for divergent regulation among genes previously proposed to be involved in diet-related local adaptation, and in many cases, the predicted effects on regulation provide explanations for previously observed signals of selection, e.g., at *FADS1*, *GPX1*, and *LEPR*. For skin pigmentation, we applied new models trained in melanocytes to a time series of 2999 ancient Europeans spanning ~38,000 years BP. In contrast to diet, skin pigmentation genes show little regulatory change over time, suggesting that adaptation mainly involved large-effect coding variants. This work demonstrates how aDNA can be combined with present-day genomes to shed light on the biological differences among ancient populations, the role of gene regulation in adaptation, and the relationship between ancient genetic diversity and the present-day distribution of complex traits.

## Introduction

In the last decade, the number of ancient DNA (aDNA) samples from anatomically modern humans (AMHs) has increased dramatically (Marciniak and Perry, 2017). These samples span the globe, and cover time periods from several hundred to tens of thousands of years ago. This is a rich data source for understanding genetic changes and adaptations that occurred as humans expanded across the globe. However, linking genetic differences in aDNA samples to phenotypes poses several challenges (Irving-Pease *et al.*, 2021). First, while the samples are often paired with archaeological information, this is limited to what biological material has survived for thousands of years. Thus, most phenotypes of

40 interest are not directly measurable. Second, due the complexity of many phenotypes and gaps in our  
41 knowledge of the genetic architecture of most traits, drawing conclusions about most phenotypes of  
42 interest based on genetic information alone is challenging (Benton *et al.*, 2021; Li *et al.*, 2020).

43 To date, most studies have focused on comparing aDNA from different geographical regions to map  
44 migrations and their relationship to archaeological changes (Skoglund and Mathieson, 2018). Shifts  
45 from a hunter-gatherer lifestyle to pastoral herding and agricultural farming have been of particular  
46 interest, because these changes had profound implications for multiple aspects of life. These include  
47 changes in day-to-day activities, population density, interactions with the environment, and substantial  
48 dietary shifts, such as increased reliance on domesticated grains (Goude and Fontugne, 2016; Olsson and  
49 Paik, 2016). These shifts likely modified selective pressures on populations as their lifestyles, diets, and  
50 pathogen exposures changed.

51 Genomic scans in present-day populations have identified many loci with evidence of positive selection  
52 (Field *et al.*, 2016; Grossman *et al.*, 2013; Rees *et al.*, 2020; Voight *et al.*, 2006). In some cases, selection  
53 can be linked to changes in the coding sequence of specific genes (Grossman *et al.*, 2013; Lamason *et al.*,  
54 2005). In others, it can be linked to changes in gene regulation. For example, selection at the *FADS1* locus  
55 is linked to increased expression (Buckley *et al.*, 2017; Mathieson and Mathieson, 2018; Ye *et al.*, 2017).  
56 However in most cases, the molecular basis of signals of selection remains poorly understood, even when  
57 a specific gene can be implicated. For example, the leptin receptor (*LEPR*) is surrounded by a haplotype  
58 that has experienced recent positive selection (Voight *et al.*, 2006), and protein-coding changes in *LEPR*  
59 have been implicated in increased cold tolerance (Hancock *et al.*, 2008). However, altered expression  
60 of this gene is also associated with altered appetite regulation and metabolism (Kentish *et al.*, 2013;  
61 Loos *et al.*, 2006). Due to the difficulty in measuring environmental variables and disentangling LD  
62 patterns, it remains unclear whether selection is acting on coding variants, expression changes, or both,  
63 and which environmental variable is the source of the selective pressure (Luca *et al.*, 2010). Even these  
64 examples are exceptional; most selection signals cannot even be confidently attributed to specific genes.  
65 Selection peaks often span many genes, with little indication of which might drive changes in fitness or  
66 the underlying molecular mechanisms. This motivated us to ask whether information about variants  
67 associated with gene expression, such as expression quantitative trait loci (eQTL), could help to identify  
68 genes under selection—analogueous to the way in which eQTL data can inform variant-gene-phenotype  
69 mapping in genome-wide and transcriptome-wide association studies.

70 We therefore developed an approach to identify genes whose regulation shifted in coordination with  
71 lifestyle changes in recent human history. These differences in regulation between ancient human groups  
72 in distinct environments suggest adaptation. To quantify gene regulation from aDNA samples, we  
73 adapted the PrediXcan-based approach we previously used to study gene regulation in archaic hominins  
74 (Colbran *et al.*, 2019; Gamazon *et al.*, 2015). Since available human aDNA have variable quality and  
75 coverage, we conducted simulations and control analyses to evaluate how models for imputing gene  
76 regulation perform when applied to low-coverage data, and how to ameliorate the effects of missing  
77 variants. These yielded heuristics for determining when regulation could be accurately modeled.

78 Guided by these simulations, we applied PrediXcan models for thousands of genes to hundreds of  
79 ancient humans representing populations from hunter-gatherer, pastoral, and agricultural lifestyles. We  
80 found enrichment for metabolic and immune pathways among the genes most divergently regulated  
81 between lifestyle groups. This reflects both the altered metabolic requirements and immune pressures  
82 of lifestyle shifts and highlights specific genes and pathways involved. For example, divergent regulation  
83 of *LEPR* suggests that its functions in metabolism and appetite regulation were relevant for recent  
84 adaptation. We also analyzed the predicted regulation of 20 diet-related genes in genomic regions with  
85 evidence of recent local adaptation. Supporting the accuracy of our approach, we rediscover the *FADS*  
86 locus regulatory haplotype that has been previously shown to vary by lifestyle and is likely the target of

87 selection. We also identified divergent regulation between aDNA samples for selected genes involved in  
88 response to selenium (*GPX1*) and carnitine (*SLC22A5*) levels.

89 Modeling gene regulation using aDNA also allows us to characterise the nature of selection on specific  
90 phenotypes. To illustrate this, we investigated changes in predicted regulation of genes involved in skin  
91 pigmentation—the phenotype that is most clearly under directional selection in these populations—  
92 using PrediXcan models trained on expression data from melanocytes. We find that skin pigmentation  
93 genes show no consistent change in regulation over time suggesting that, for this particular phenotype,  
94 evolutionary change was driven by coding variants rather than regulatory changes. Overall, this work  
95 provides an atlas of imputed regulation for hundreds of ancient humans across thousands of genes to  
96 facilitate future exploration of gene regulatory shifts in recent human evolution, and demonstrates the  
97 utility of combining molecular predictive models with ancient DNA to understand the evolution of  
98 complex traits.

## 99 Results

### 100 Gene regulatory patterns can be imputed using low-coverage aDNA data

101 The genetically regulated component of gene expression can be predicted by machine learning models  
102 trained on gene expression. Previous approaches have applied these models to genome-wide common  
103 variant data from present-day humans (Fig. 1A), for example to perform transcriptome-wide association  
104 studies (Gamazon *et al.*, 2015; Zhou *et al.*, 2020; Zhu and Zhou, 2020), and to high-coverage archaic  
105 hominin genomes (Colbran *et al.*, 2019). Here, we adapt this approach to enable application to low-  
106 coverage genotype data from ancient human individuals, considering the unique attributes of these data.  
107 In particular, aDNA data vary in coverage, depth, and quality. This creates a trade-off between number  
108 of individuals available for analysis and the genotype quality.

109 To explore this trade-off and the feasibility of this approach on available aDNA data, we created  
110 simulated ancient genomes by removing variants from present-day individuals with whole-genome se-  
111 quencing from the 1000 Genomes Project (1kG) (The 1000 Genomes Project Consortium, 2015). (See  
112 the Supplementary Materials for detailed discussion.) First, we found that PrediXcan models trained  
113 using common variants identified from present-day whole genome sequencing data are robust to ran-  
114 dom patterns of missing data (Spearman  $\rho > 0.75$  with up to 45% of variants missing; Supplementary  
115 Fig. 2A). However, nearly all aDNA samples used here were genotyped by targeted capture of  $\sim 1240k$   
116 variants (“1240k set”; Supplementary Fig. 1B) (Fu *et al.*, 2015; Haak *et al.*, 2015). Furthermore, many  
117 of the ancient samples have low genotyping coverage resulting in many missing variants (Supplementary  
118 Fig. 2B). Thus, we next matched the missing data to patterns observed in aDNA and compared the per-  
119 formance of different prediction models applied to full genomes vs. genomes with simulated missing data  
120 (Supplementary Fig. 1A). These models’ consistency decreased substantially when applied to genomes  
121 with missing data matched to that in ancient DNA samples (median Spearman  $\rho = 0.39$ ; Fig. 1B).

122 To address this, we trained prediction models using only variants from the 1240k set. The predictions  
123 of these models were correlated with those of the full models (median Spearman  $\rho = 0.67$ ), as expected  
124 given the LD between variants in the 1240k set and those in the full models. We also identified a set of  
125 variants that were most frequently available in the highest quality ancient samples; this resulted in a set of  
126 the 600,000 most-informative variants from the 1240k set (“top600k set”). We then trained models using  
127 these variants targeted to the aDNA data (top600k) and evaluated their performance on full genomes and  
128 simulated ancient genomes (Methods). While predictions made by the 1240k and top600k models were  
129 largely consistent with those made by the Full models when applied to genomes with no missing data  
130 (median rho 0.82 and 0.79 respectively), only the 1240k models maintained consistency when applied to

131 incomplete genomes (Fig. 1C). We therefore concluded that the 1240k trained models strike a balance  
132 between accuracy and sample size when applied to ancient data, and thus we used these models for the  
133 rest of our analysis.

## 134 **Imputing gene regulatory differences between ancient human populations**

135 We collected ancient human samples with genetic data from a variety of sequencing and genotyping  
136 platforms (Methods). Based on the analyses in the previous section, we ranked individuals by the  
137 number of sites successfully genotyped, and took the top quartile of individuals ( $>771240$  SNPs, or  
138  $0.74\times$  coverage), restricting to individuals from Eurasia due to sample density and genetic similarity to  
139 the training data (Fig. 2A). The samples ranged in date from 90 years before present (yBP) to 45,000  
140 yBP, with the majority between 2,500 and 6,000 yBP (Fig. 2B).

141 We then assigned individuals to a lifestyle (hunter-gatherer, pastoralist, or agricultural) by literature  
142 review of the associated archaeological culture based on information from the original aDNA publications.  
143 In general, hunter-gatherers were from sites: 1) dated to times before any evidence of domestication  
144 or 2) with evidence only for foraging and meat consumption and no domesticated plants or animals.  
145 Agriculturalists were from sites with evidence for domesticated grains and animals. Pastoralists can  
146 be difficult to distinguish from agriculturists, and here refers to individuals from often semi-nomadic  
147 societies focused on domesticated animals (primarily the Yamnaya and similar groups). In addition, in  
148 some cases, the lifestyle distinction was based on genetic similarity to other groups, so the categories used  
149 here are based on a combination of genetics and archaeology. Because of these difficulties, we focused  
150 primarily on comparisons between hunter-gatherers and the other groups. This process resulted in 490  
151 ancient Eurasian individuals with an assigned lifestyle and aDNA for further study (Fig. 2C).

152 We then applied the 210,800 “1240k” gene regulation prediction models described in the previous  
153 section to the 490 ancient samples, as well as to 503 present-day Europeans from the 1000 Genomes  
154 Project (The 1000 Genomes Project Consortium, 2015). This resulted in normalized expression pre-  
155 dictions in different tissues (“predicted regulation”) for 14,873 unique genes. The observed expression  
156 level of a gene in a tissue in an individual is a combination of genetically regulated and environmental  
157 factors. The output of our prediction model is not a direct proxy for the observed expression, but rather  
158 a quantification of the genetic component of gene regulation. Thus, differences in predicted regulation  
159 between individuals reflect potential differences in the inherited genetic component of expression, not  
160 environmentally driven differences.

## 161 **Divergently regulated genes are enriched for immune and metabolic functions**

162 To survey high-level differences among ancient individuals from the three lifestyle groups, we identified  
163 divergently regulated genes as those for which the  $P$ -value of a Kruskal-Wallis test passed a Bonfer-  
164 roni multiple testing correction (per-tissue). For example, *GPR84* was among the most differences in  
165 predicted regulation between populations (Fig. 3A; Adrenal Gland predicted regulation of  $-0.0421$  in  
166 agriculturalists vs.  $0.197$  in hunter-gatherers; K-W  $P$ -value ). Overall, 5759 unique genes showed evi-  
167 dence of divergent regulation between lifestyles in at least one tissue (median 2 tissues; Supplementary  
168 Fig. 6A), and an average of 9.8% of genes in each tissue were divergent (Supplementary Fig. 6B). How-  
169 ever, most divergent genes had relatively small changes in magnitude between groups (e.g. maximum  
170  $1.17$  magnitude difference between hunter-gatherers and agriculturalists in Subcutaneous Adipose) and  
171 the majority of these differences are likely attributable to genetic drift, rather than the effects of selection.  
172 We therefore imposed a genomic control (Methods) on the full distribution of 210,800 (genes  $\times$  tissues)  
173 Kruskal-Wallis  $P$ -values (Fig. 3A). We focused on the 500 genes with the most evidence of divergent  
174 regulation (corrected  $P < 3.46 \times 10^{-3}$ , FDR = 0.586), which may be enriched for targets of selection.

175 We hypothesized that immune and metabolic traits were among those under the most selective pres-  
176 sure as populations transitioned between lifestyles. To identify systematic patterns in the 500 most di-  
177 vergently regulated genes, we conducted Gene Ontology (GO) over-representation analysis. The twenty  
178 most-enriched annotation terms (Fig. 3B) included immune-related (e.g. “antigen processing and pre-  
179 sentation”) as well as basic metabolic processes and cellular functions (e.g. “glycoprotein metabolic  
180 process”). In addition, the enrichments for some of the more general terms may be driven by genes  
181 with pleiotropic immune system effects. For example, the eight genes driving the enrichment of the  
182 “DNA-templated transcription, elongation” term included *THOC5*, which also functions in immunity  
183 and response to stimuli through cytokine-mediated pathways (Mancini *et al.*, 2004; Tamura *et al.*, 1999),  
184 *ELP1*, which has functions in proinflammatory signalling (Cohen *et al.*, 1998), and *AFF4*, a component  
185 of the super elongation complex, which is recruited in response to HIV-1 infection (Chou *et al.*, 2013; He  
186 *et al.*, 2010).

187 Many gene sets are likely to maintain similar regulatory patterns across populations, regardless of  
188 lifestyle, and these should not be enriched among the top divergently regulated genes. To test this, we  
189 quantified the enrichment of three such sets under strong functional constraint among the 500 most di-  
190 verged genes between lifestyle groups across tissues: 1) genes that have experienced stabilizing selection  
191 on their levels of expression across many species (Chen *et al.*, 2018), 2) genes responsible for core house-  
192 keeping functions (Eisenberg and Levanon, 2013), and 3) genes that are intolerant to loss-of-function  
193 coding variation (“LOF-intolerant”) in present-day humans (Lek *et al.*, 2016) (Methods). As expected,  
194 LOF-intolerant genes and those under long-term stabilizing selection are not enriched (Table 1). Surpris-  
195 ingly, housekeeping genes were slightly enriched (OR = 1.33,  $P = 0.0076$ ). By definition, housekeeping  
196 genes have uniform and ubiquitous expression across tissues, so this pattern could partially be explained  
197 by increased power to model changes in their regulation in multiple tissues. However, many housekeeping  
198 genes are also involved in basic cellular metabolism (Eisenberg and Levanon, 2003), which could require  
199 fine tuning in response to changes in nutrient sources or other environmental shifts. We also tested for  
200 enrichment of genes that encode proteins that directly interact with viruses, since these genes are known  
201 to evolve rapidly (Enard *et al.*, 2016), but we find no enrichment among the top 500 genes, suggesting  
202 that selection at these loci could be driven by coding rather than regulatory changes.

203 Several of the top divergently regulated genes underlying the GO functional enrichments have been  
204 implicated in local adaptation, for example *EP300* (Zheng *et al.*, 2017) and several subunits of HLA-DQ  
205 (Catassi and Catassi, 2018; De Silvestri *et al.*, 2018; Pierini and Lenz, 2018). In the next two sections,  
206 we explore the connection between sequence signatures of recent adaptive evolution and divergent gene  
207 regulation with a focus on diet and skin pigmentation.

## 208 **Changes in gene regulation contributed to adaptation to diet between ancient** 209 **lifestyles**

210 Many regions of the human genome bear signatures of recent population-specific adaptive evolution.  
211 However, the phenotypic drivers and molecular mechanisms underlying these evolutionary signatures are  
212 largely unresolved. Since diet was one of the main factors that shifted with the change from hunting and  
213 gathering to farming, we hypothesized that gene regulatory changes between lifestyle groups might be  
214 the target of signals of selection at dietary genes.

215 We compared the predicted regulation of 20 diet-related genes in regions with evidence of population-  
216 specific local adaptation (Rees *et al.*, 2020) between ancient human groups with different lifestyles (Meth-  
217 ods). Models for the 20 genes tested were enriched for lower  $P$ -values ( $P = 1.19 \times 10^{-14}$ , K-S test), with  
218 4 unique genes among the top 500 most diverged genes by group (Supplementary Table 4).

219 *FADS1* showed the most consistent evidence for divergent regulation between agriculturalists, pas-



220 toralists, and hunter-gatherers, with nominally significant differences in 21 tissues (Supplementary Table  
221 2). In each tissue, hunter-gatherers had significantly lower *FADS1* levels than in agriculturalists or  
222 present-day Europeans, as would be expected from a diet containing higher levels of long-chain plasma  
223 unsaturated fatty acids (Fig. 4B). We observed a similar trend among 32 ancient Africans, indicating that  
224 this is not necessarily specific to Eurasian populations (Supplementary Fig. 7A). The variants driving  
225 these regulatory differences are in linkage disequilibrium (LD) with the functional haplotype implicated  
226 in previous evolutionary studies (Supplementary Fig. 7A; Supplementary Table 3) (Ameur *et al.*, 2012;  
227 Buckley *et al.*, 2017; Mathieson and Mathieson, 2018; Ye *et al.*, 2017). Overall, *FADS1* predicted regu-  
228 lation is also negatively correlated with the date of the sample (Spearman  $\rho = -0.32$ ,  $P = 1.95 \times 10^{-20}$ ,  
229 which agrees with known allele frequency trajectories (Buckley *et al.*, 2017; Mathieson and Mathieson,  
230 2018; Ye *et al.*, 2017).

231 Another gene in the *FADS* gene cluster, *FADS2*, functions in the same pathway as *FADS1* and is  
232 also among the 500 most diverged genes. However it shows evidence for divergent regulation in fewer  
233 tissues than *FADS1* (Supplementary Table 4), and the direction of effect is not consistent across tissues.  
234 Its presence therefore seems more likely to be due to overlap in regulatory variants with *FADS1* than  
235 to selection on *FADS2* regulation specifically. Our results further support the relevance of lifestyle  
236 differences between ancient populations in selection on the *FADS* locus and highlights the potential  
237 importance of regulatory changes of *FADS1* in dietary adaptation in Eurasians.

238 Among the putative diet adaptation genes, *GPX1*, an antioxidant selenoprotein, and *SLC22A5*, a  
239 transporter responsible for recycling and uptake of carnitine (Console *et al.*, 2018). (Supplementary Table  
240 4; Supplementary Fig. 8) were also divergently regulated. The *GPX1* locus has experienced selective  
241 sweeps related to environmental selenium levels (Engelken *et al.*, 2016; White *et al.*, 2015), and has been  
242 implicated in response to viral infections (Guillin *et al.*, 2019). Carnitine plays an important role in the  
243 transport of certain long-chain fatty acids to the mitochondria for energy production; thus, modulation  
244 of its regulation could suggest a difference in metabolism related to variation in the energy demands of  
245 different lifestyles. Both selenium and carnitine levels differ in the likely primary diets of the ancient  
246 populations considered here (Flanagan *et al.*, 2010; Mann, 2018), suggesting that both as potential  
247 targets of local adaptation.

248 Though it was not on the list of putative diet-related adaptation genes, *LEPR* has been suggested as  
249 the driver of nearby signatures of selection due to its function in appetite and cold tolerance (Hancock  
250 *et al.*, 2008; Luca *et al.*, 2010; Voight *et al.*, 2006). *LEPR* was divergently regulated between lifestyle  
251 groups in the cerebellum (Fig. 4B) (the only brain tissue with a model for *LEPR*), both adipose tissues,  
252 and several other tissues. It was consistently predicted to be downregulated in agriculturalists compared  
253 to the other two groups in each tissue (Supplementary Table 5). Leptin is a hormone produced by adipose  
254 cells that suppresses appetite (Barrios-Correa *et al.*, 2018), so this supports a possible connection between  
255 appetite regulation and the observed signatures of selection. This is particularly relevant to modern  
256 populations given the association of decreased *LEPR* function with obesity and metabolic disorders  
257 (Dehghani *et al.*, 2018; Farooqi *et al.*, 2007).

258 Overall, these analyses suggest that recent regulatory changes made a substantial contribution to  
259 adaptation to diet. More broadly, they demonstrate the potential for this method to explain observed  
260 signals of selection and to disentangle its effects on nearby genes.

## 261 **Skin pigmentation evolution was not driven by changes in gene regulation**

262 We hypothesized that genes involved in complex phenotypes under selection in a population would  
263 exhibit systematic changes over time in their regulation. To test this, we focused on skin pigmentation,  
264 a trait that is known to have been under selection in humans in West Eurasia (Berg and Coop, 2014; Ju

265 and Mathieson, 2020; Wilde *et al.*, 2014) and for which many of the genes involved are well-understood  
266 (Sturm and Duffy, 2012). We trained new PrediXcan models using genetic variants and gene expression  
267 in melanocytes from a diverse population (Zhang *et al.*, 2017). We were able to model 17 genes known  
268 to be involved in the melanogenesis pathway (Sturm and Duffy, 2012). Because skin pigmentation-  
269 associated variants changed in frequency over time, we applied these models to a time series of 2999  
270 ancient Europeans dated between 38,052 yBP and 150 yBP, as well as 503 present-day Europeans from  
271 the 1000 Genomes Project and tested for systematic changes over time in predicted regulation.

272 Skin pigmentation genes are not enriched for differential regulation compared to all 6923 genes mod-  
273 eled in melanocytes (K-S Test  $P = 0.53$ ; Fig. 5A). Predicted regulation showed a nominally significant  
274 linear relationship with time for only four skin pigmentation genes (Table 1), and only one (*TYR*)  
275 remained significant after genomic control.

276 We predict that *TYR*'s expression increased over time (Fig. 5B) and is higher in non-African (particu-  
277 larly European) populations compared to African populations (Fig. 5C), and in (more recent) agricultur-  
278 alist populations compared to hunter-gatherers (Fig. 5D). *TYR* encodes an enzyme important for one of  
279 the earliest steps of the melanogenesis pathway and loss-of-function mutations cause albinism (Ghodsine-  
280 jad Kalahroudi *et al.*, 2014; Norman *et al.*, 2017). It is therefore surprising that increased expression  
281 would be driven by selection for decreased pigmentation. One possibility is that increased expression  
282 due to gene regulatory variants compensates for the increase in frequency in Europeans of an activity-  
283 reducing coding variant (rs1042602) in *TYR* (Wilde *et al.*, 2014). Selection on pigmentation could favor  
284 the coding variant, while the maintenance of other functions of the gene could require increased expres-  
285 sion. Supporting this, rs1042602 has a positive weight in the fitted PrediXcan model showing that it in  
286 fact is associated with increased expression.

287 Finally, we were unable to build accurate PrediXcan models for many known pigmentation genes,  
288 including those with known selected coding changes (Lamason *et al.*, 2005; Soejima and Koda, 2007),  
289 mostly because there was not enough regulatory variation nearby the genes. Overall, our results suggest  
290 that, in contrast to diet, changes in gene regulation did not play a large role in the evolution of skin  
291 pigmentation in Europe. This is consistent with observations that selection signals for pigmentation-  
292 associated variants in Europe are mostly driven by a relatively small number large-effect, coding variants  
293 despite the polygenic nature of the phenotype Ju and Mathieson (2020).

| Gene         | $\beta$ (All) (95%CI)          | $P$ (all) | $\beta$ (<15ky) (95%CI)         | $P$ (<15ky) |
|--------------|--------------------------------|-----------|---------------------------------|-------------|
| <i>TYR</i>   | -2.05e-6 (-3.1e-6 - 9.67e-7)   | 0.00021   | -4.7e-6 (-6.43e-6 - -2.97e-6)   | 1.08e-7     |
| <i>TRPM1</i> | -9.93e-7 (-1.97e-6 - -2.05e-8) | 0.045     | -2.039e-6 (-3.59e-6 - -4.83e-7) | 0.010       |
| <i>MITF</i>  | 1.65e-6 (1.08e-7 - 3.2e-6)     | 0.036     | 2.80e-6 (3.34e-7 - 5.27e-6)     | 0.026       |
| <i>KIT</i>   | -3.62e-7 (-7.56e-7 - 3.16e-8)  | 0.071     | -7.08e-7 (-1.33e-6 - -8.10e-8)  | 0.027       |

Table 1: **Skin pigmentation genes with nominally significant associations between ancient sample age and regulation.** Betas and P-values were calculated using a linear regression of the predicted regulation on the date, including the first 10 ancestry principal components.

## 294 Discussion

295 In this study, we adapted the PrediXcan approach for modeling the genetic component of tissue-specific  
296 gene regulation and applied it to hundreds of low-coverage ancient DNA samples from individuals from  
297 three different lifestyles and to a ~38,000-year transect of ancient Europeans. Our simulations and  
298 evaluations suggest that models of gene regulation for thousands of genes retain utility even when variant

299 data are limited, as long as the models are trained for the specific application and their limitations  
300 properly taken into account. This is encouraging for the expansion of the PrediXcan approach to other  
301 contexts in which different variants were assayed than those used to train the original PrediXcan models.  
302 As more accurate methods are developed, it will be important to keep this aspect of their performance  
303 in mind.

304 Here, we found that over 5,000 genes showed evidence for divergent regulation among ancient hunter-  
305 gatherers, pastoralists, and agriculturalists in at least one tissue. The 500 genes most divergently regu-  
306 lated between lifestyles were enriched for metabolic and immune processes, indicating that altered gene  
307 regulation has shaped these functions during recent human evolution. Focusing on genes involved in diet,  
308 we find enrichment for divergent regulation in genes with nearby signals of recent selection, suggesting  
309 that changes in gene regulation may play a substantial role in adaptation to changes in diet.

310 Second, we trained new prediction models in melanocytes to analyze changes in the regulation of skin  
311 pigmentation genes in a time transect of ancient and present-day Europeans spanning 38,000 years. In  
312 contrast to genes associated with diet, we found that most genes we modeled show little to no systematic  
313 change in regulation over time, suggesting that selection on skin pigmentation mostly operated on a  
314 few large-effect coding variants. The exception, *TYR*, is predicted to have been up-regulated over time,  
315 which is contrary (with respect to the trait) to the effects of a known coding variant in the gene and the  
316 predicted effects of gene expression on the trait itself (Chaki *et al.*, 2011; Wilde *et al.*, 2014). However,  
317 the increased expression in Europeans may be a response to the increase in frequency of a coding variant  
318 (rs1042602) that decreases activity. These results underscore the wide variety of adaptive mechanisms in  
319 recent human evolution, and the ability of ancient DNA to illuminate these mechanisms. The other skin  
320 pigmentation genes that show nominal changes in predicted regulation over time, *MITF* and *TRPM1*,  
321 are closely linked to *TYR* in the melanogenesis pathway, with *MITF* regulating both *TYR* and *TRPM1*  
322 (D’Mello *et al.*, 2016). Further analysis of the predicted perturbations of those relationships is needed  
323 to better understand the phenotypic consequences of these changes.

324 There are a several caveats to consider when interpreting these PrediXcan results. Previous work  
325 has demonstrated that, while there are some decreases in accuracy, the approach maintains utility when  
326 applied to non-European present-day populations and to archaic hominins (Colbran *et al.*, 2019; Petty  
327 *et al.*, 2019). Furthermore, the ancient Eurasian individuals considered here are less diverged from the  
328 GTEx cohort used for training than in these previous applications. However, due to the low coverage of  
329 the aDNA data and the focus on commonly assayed variants, there are many regulatory effects that these  
330 models do not capture. In addition, the models do not capture the effects of environment (both direct  
331 and indirect) on gene expression. Therefore, while differences in predicted regulation do not necessarily  
332 indicate a change in transcript expression levels, they do identify change in the genetic architecture  
333 of a gene’s regulation. Our approach is therefore complementary to experimental assays of the regulatory  
334 effects of ancient genomic variants in present-day human cells (Weiss *et al.*, 2021), and such approaches  
335 could be used to test our computational predictions. Another major limitation is that we are only able  
336 to draw conclusions about genes with sufficient expression and nearby present-day common variation.  
337 Finally, we have not developed a formal test for selection on gene regulation. While we have in some  
338 cases been able to link regulatory variation to signals of selection based on genomic data, most of the  
339 differences we observe were likely the result of genetic drift. Developing tests for selection on gene  
340 regulation that consider aDNA remains an important area for future work.

341 Despite these limitations, we demonstrate the utility of considering regulatory effects of variants in  
342 combination in ancient individuals. In particular, we show that changes in gene regulation were essential  
343 to many, but not all, recent human adaptations. The frequent occurrence of metabolic and immune genes  
344 among the most divergently regulated genes between ancient lifestyles underscores the contribution of  
345 gene regulation to adaptation to the substantial changes in lifestyle that the shift from nomadic hunting



346 and gathering to stationary farming had on humans. Our targeted analysis of diet genes with evidence  
347 of results adaptive evolution further suggests that adapting to diets with different nutrient and fat  
348 compositions required population-level shifts in the regulation of many metabolic genes. In contrast, the  
349 lack of consistent gene regulatory changes in skin pigmentation genes suggests that adaptation in this  
350 trait was mainly mediated by coding variants.

351 Lifestyle and sun exposure are not the only variables that differ among the ancient humans with  
352 genetic information, and more diverse aDNA data are rapidly becoming available. Therefore, extending  
353 this analysis to ancient individuals across other evolutionary shifts will be promising. It will also be infor-  
354 mative to expand studies into non-European populations, both ancient and present-day, to learn when  
355 gene regulatory shifts are unique to specific populations or shared.

356 Overall, this study demonstrates the power of focusing evolutionary analyses on combinations of  
357 variants with established relationships to molecular phenotypes. Our approach is well-positioned to  
358 use the increasing availability of present-day and ancient genome data to provide both mechanistic  
359 explanations of selection signals and to generate hypothesis about phenotypic differences between ancient  
360 and present-day groups. While this study focused on gene regulatory shifts in response to changes in  
361 lifestyle and temporal shifts in regulation of skin pigmentation genes, similar methods could be applied  
362 in many other questions and sets of ancient samples. Given the importance of gene regulation in recent  
363 evolution, this is a necessary step in identifying and interpreting candidate regions that have been shaped  
364 by recent human evolution. Further analyses using this approach will contribute to understanding the  
365 genome's response to large-scale environmental changes and the influence of these changes on humans  
366 today.

## 367 **Methods**

### 368 **Ancient genotype and lifestyle data**

369 For the lifestyle analyses, we obtained ancient human genotypes from a set compiled and analyzed by  
370 the Allen Ancient DNA Resource (v42.4; accessed March 1, 2020), then lifted them over the Genome  
371 Build hg38 using liftOverPlink. We filtered out samples that did not pass their QC procedure and ranked  
372 remaining samples by genotype count (i.e., the number of variants with a genotype call). We also filtered  
373 samples by their continent of origin, and primarily focused on 490 ancient Eurasians. (A FADS1 analysis  
374 additionally considered 32 ancient Africans.) For a present-day comparison, we used genome for 503  
375 European samples from the 1000 Genomes Project (The 1000 Genomes Project Consortium, 2015).

376 We manually assigned ancient samples to lifestyle groups by literature review based on archaeological  
377 information about the site and previous research about the associated culture. More specifically, we  
378 used lifestyles as assigned by the original publication of the sample where available. We then propagated  
379 those lifestyle labels to other samples based on the associated culture (again, as assigned by the original  
380 publication), then conducted a further literature review to match any unassigned cultures to a lifestyle  
381 based on similarity to those already matched. Samples were removed from consideration when there was  
382 not enough lifestyle-related evidence to make a call. The distinction between pastoral and agricultural  
383 groups was often difficult, and when there was ambiguity the groups were preferentially assigned to the  
384 agricultural category (Supplemental File S1).

## 385 Adapting PrediXcan for aDNA

### 386 Final models for aDNA-based gene regulation prediction

387 The set of models used for all lifestyle analyses were trained on whole genome sequencing and RNA-seq  
388 data from GTEx v8 for 49 tissues using 1,240,000 variants that were genotyped by first enriching for  
389 the targeted variants (“1240k set”) (Fu *et al.*, 2015; Haak *et al.*, 2015). For each tissue, we considered  
390 only models that explained a significant amount of variance ( $FDR < 0.05$ ,  $r^2 > 0.01$ ). In addition, we  
391 further required that each 1240k-trained model maintain high correlations with the original GTEx model  
392 ( $r > 0.5$ ) over all 2504 1kG individuals. All LD calculations for variants in all 1kG Populations were  
393 made using LDLink (Machiela and Chanock, 2015).

394 The set of models used to study skin pigmentation were trained on genotype and RNA-seq data  
395 collected from melanocytes from 106 male skin samples (Zhang *et al.*, 2017). We imputed all genotypes  
396 to 1000 Genomes using the NIH TOPMed server (Das *et al.*, 2016) with the following settings: ref:  
397 1kG Phase 3 v5; pop = other/mixed; rsq filter 0.001; phasing = eagle v2.4. We filtered genes to those  
398 with measured expression in at least 10 samples, with RSEM  $> 0.5$  and  $> 6$  reads, then each gene was  
399 inverse quantile normalized to a standard normal distribution across samples. We then corrected for  
400 ancestry using the first 3 principle components and 10 PEER factors. We trained the PrediXcan models  
401 using only ~1,240,000 SNPs that were genotyped by first enriching for those targeted SNPs (“1240k  
402 set”) (Fu *et al.*, 2015; Haak *et al.*, 2015), and included any gene for which the model was able to explain  
403 a nominally significant amount of variance in the observed expression ( $P < 0.05$ ). We focused on a set of  
404 17 genes (Sturm and Duffy, 2012) involved in skin pigmentation for which we were able to build models.

405 We abbreviate the 49 GTEx tissues considered as follows: Adipose - Subcutaneous: ADPS, Adipose  
406 - Visceral Omentum: ABPV, Adrenal Gland: ADRNLG, Artery - Aorta: ARTA, Artery - Coronary:  
407 ARTC, Artery - Tibial: ARTT, Brain - Amygdala: BRNAMY, Brain - Anterior Cingulate Cortex:  
408 BRNACC, Brain - Caudate: BRNCDT, Brain - Cerebellar Hemisphere: BRNCHB, Brain - Cerebel-  
409 lum: BRNCHA, Brain - Cortex: BRNCTX, Brain - Frontal Cortex: BRNFCTX, Brain - Hippocampus:  
410 BRNHPP, Brain - Hypothalamus: BRNHPT, Brain - Nucleus Accumbens basal ganglia: BRNNCC,  
411 Brain - putamen basal ganglia: BRNPMT, Brain- Spinal Cord Cervical C-1: BRNSPN, Brain- Substan-  
412 tia Nigra: BRNSN, Breast: BREAST, Cells - Transformed Fibroblasts: FIBS, Colon - Sigmoid: CLNS,  
413 Colon - Transverse: CLNT, Esophagus - Gastroesophageal Junction: ESPGJ, Esophagus - Mucosa:  
414 ESPMC, Esophagus - Muscularis: ESPMS, Heart - Atrial Appendage: HRTAA, Heart - Left Ventri-  
415 cle: HRTLTV, Kidney Cortex: KDNY, Liver: LIVER, Lung: LUNG, Minor Salivary Gland: MNRSB,  
416 Cells- EBV-transformed Lymphocytes: LYMPH, Ovary: OVARY, Pancreas: PNCS, Pituitary: PTTY,  
417 Prostate: PRSTT, Skeletal Muscle: MSCSK, Skin - Not sun-exposed: SKINNS, Skin - Sun-exposed:  
418 SKINS, Small Intestine: SMINT, Spleen: SPLEEN, Stomach: STMCH, Testis: TESTIS, Thyroid: THY-  
419 ROID, Tibial Nerve: NERVET, Uterus: UTERUS, Vagina: VAGINA, Whole Blood: WHLBLD.

### 420 Evaluating strategies for applying PrediXcan to aDNA

421 To evaluate the performance of different strategies for training PrediXcan regulation prediction mod-  
422 els and applying them to aDNA, we carried out several simulations. In the random simulations, for  
423 each percentage missing threshold, we randomly selected 20 European individuals from 1kG (The 1000  
424 Genomes Project Consortium, 2015), then randomly removed that percentage of genotype calls from  
425 their genomes before applying PrediXcan models to the simulated genomes (Supplementary Fig. 1). For  
426 each downsampled genome, we calculated a Spearman correlation between the predicted regulation of  
427 each gene in four tissues for the downsampled vs. the full genome. Thus, each box in Supplementary  
428 Fig. 2A has 80 ( $20 \times 4$ ) points. We then calculated the Spearman correlation between the median corre-

429 lation between downsampled and full model predictions for each threshold and the percentage of variants  
430 missing at that threshold.

431 We also simulated missing data by matching patterns of missing variants from aDNA samples (Sup-  
432 plementary Fig. 1B). We used 3383 ancient human samples compiled and made available by the Allen  
433 Ancient DNA Resource on March 1, 2020 (v42.4). We selected three random Europeans from 1kG,  
434 then for each ancient sample we created three matching masked genomes that were missing exactly the  
435 same variants. For each masked genome, we calculated the Spearman correlation between the predicted  
436 regulation of each gene in all four tissues for the masked vs. the full genome (i.e. one correlation per  
437 individual).

438 We also evaluated three different sets of variants for training PrediXcan models. The “full set”  
439 consisted of all variable sites identified in GTEx v8 (this included both single nucleotide variants and  
440 short indels in hg38 coordinates). The “1240k set” was formed by intersecting the full set with the variants  
441 genotyped on the 1240k chip, which totalled 714,959 variants after lifting them over to hg38. Lastly, we  
442 assembled the “top600k set” of variants, which is a subset of the 1240k set with high “support”. We  
443 calculated the “support” for each variant over  $N$  aDNA samples as  $\sum_{n=1}^N NumVars_n$ , where  $NumVars$   
444 is the number of variants successfully called in sample  $n$ . In other words, support for a variant is  
445 the number of samples in which that variant was successfully genotyped, weighted by the quality (i.e.,  
446 number of genotyped variants) of the sample. A variant can therefore obtain a high support either by  
447 being genotyped in many low-quality samples, or in fewer high-quality samples. We ranked the variants  
448 by their support. We identified the top 600k variants, and for the purposes of simulating the behaviour  
449 of models when applied to incomplete data, we also considered the top 500k variants with the highest  
450 support (“top500k”;  $N = 499,666$ ). For each set of variants, we trained a set of models and created a  
451 set of 1kG genomes masked to only include those variants (Fig. 1A). We assessed the performance of  
452 combinations of models and genomes by calculating the correlation of predictions made by each model-  
453 genome pair with predictions made by the Full models on the Full 1kG Genomes (i.e. one correlation  
454 was calculated per individual 1kG sample for each pair).

## 455 Identifying divergent gene regulation between ancient lifestyles

456 To identify genes with evidence for divergence in predicted gene regulation between the three lifestyle  
457 groups, we applied a Kruskal-Wallis test for the predictions of each gene model over individuals from  
458 each group. We accounted for multiple testing with a Bonferroni correction within each tissue. Genes  
459 passing the correction in at least one tissue are said to show evidence for a significant difference in  
460 regulation. To further isolate the genes that are the most likely to be diverged due to selection rather  
461 than drift, used genomic control to correct for population stratification by calculating an inflation factor  
462  $\lambda$  and recalculating p-values based on the distribution of  $\chi^2/\lambda$  (Devlin and Roeder, 1999). To focus our  
463 discussion on the genes with the strongest evidence for divergence, we sorted all models by GC-corrected  
464  $P$ -value and identified the top 500 unique genes (corresponding to 1236 models), which corresponded to  
465 those with at least one model with a GC-corrected  $P < 3.46 \times 10^{-3}$  and FDR=0.586.

## 466 Gene set enrichment among diverged genes

467 To conduct functional enrichment analyses on the top 500 most diverged genes, we tested for GO anno-  
468 tation over-representation using WebGestalt with default parameters (Liao *et al.*, 2019) Specifically, we  
469 compared the biological process GO terms among the 500 most diverged genes versus all genes with a  
470 model in at least one tissue. We also tested for enrichment of several other gene sets of interest: 1) genes  
471 whose expression in particular tissues is under stabilizing selection across 17 mammalian species (Chen  
472 *et al.*, 2018); genes that are intolerant to loss-of-function variants in their protein products (called if

473 the upper bound of the 95% confidence interval of the observed/expected ratio is lower than 0.35) (Lek  
474 *et al.*, 2016); 3) housekeeping genes that show consistent expression across tissues (Eisenberg and Lev-  
475 anon, 2013); and 4) a set genes encoding virus interacting proteins (Enard *et al.*, 2016). We calculated  
476 an odds ratio for each, and used a Fisher’s exact test to determine significance. For the genes under  
477 stabilizing selection on gene expression, we considered only those tested in that study before calculating  
478 statistics.

## 479 Skin pigmentation time series data and analysis

480 We obtained ancient human genome data from the Allen Ancient DNA Resource (v44.3; accessed Febru-  
481 ary 8, 2021). We filtered for individual human samples from Europe (west of 59° East), and in the case  
482 of duplicate individuals chose the sample with the highest average coverage. We filled in missing dosages  
483 using the mean dosage across the other samples. This resulted in 2999 ancient Europeans, to which we  
484 added 503 European samples from the 1000 Genomes Project (The 1000 Genomes Project Consortium,  
485 2015) to construct a time series ranging from 38,052 yBP to present (31 samples were older than 15,000  
486 yBP).

487 To identify genes which showed a systematic change in regulation over time, we obtained predicted  
488 regulation values for each gene in each individual using the melanocyte PrediXcan models. We then re-  
489 gressed the predicted regulation on the date of the sample using a linear regression framework, including  
490 the first 10 principle components to correct for ancestry. We further controlled for population strati-  
491 fication using genomic control (Devlin and Roeder, 1999), and identified the skin pigmentation genes  
492 for which the effect size of date was significant (corrected  $P < 0.05$ ). We additionally compared the  
493 predicted regulation of *TYR* in all 2504 individuals from the 1000 Genomes Project (The 1000 Genomes  
494 Project Consortium, 2015), separated by continental ancestry.

## 495 Data and Code Availability

496 All data and scripts are available on Github at [https://github.com/colbrall/ancient\\_human\\_predixcan](https://github.com/colbrall/ancient_human_predixcan)  
497 and [https://github.com/colbrall/skin\\_pigmentation\\_regulation](https://github.com/colbrall/skin_pigmentation_regulation)

## 498 Acknowledgements

499 We would like to thank Eric Gamazon for discussions and help with data acquisition, as well as Dan  
500 Zhou for help in debugging the PrediXcan training pipeline. We would also like to thank current and  
501 former members of the Capra and Mathieson labs for useful discussions of the project and for providing  
502 comments on the figures and manuscript.

503 L.L.C. was funded by NIH grant T32GM080178 to Vanderbilt University and T32HG009495 to the  
504 University of Pennsylvania. I.M. was funded by NIH award R35GM133708. J.A.C. was funded by NIH  
505 award R01GM115836 and R35GM127087, and the Burroughs Wellcome Fund.

506 This work was conducted in part using the resources of the Advanced Computing Center for Research  
507 and Education at Vanderbilt University, Nashville, TN. The research is solely the responsibility of the  
508 authors and does not necessarily represent the official views of Vanderbilt University Medical Center,  
509 the National Institutes of Health, or other funding agencies.

## 510 Author Contributions

511 L.L.C., I.M. and J.A.C. designed the experiments and wrote the manuscript. M.R.J. designed the  
512 simulation experiments and conducted pilot simulation analyses. L.L.C conducted all other experiments.  
513 All authors edited and approved the final manuscript.

## 514 Competing Interests

515 The authors report no conflicts of interest.

## 516 Bibliography

- 517 Ameer, A., Enroth, S., Johansson, A., Zaboli, G., Igl, W., Johansson, A. C. V., Rivas, M. A., Daly,  
518 M. J., Schmitz, G., Hicks, A. A., Meitinger, T., Feuk, L., van Duijn, C., Oostra, B., Pramstaller, P. P.,  
519 Rudan, I., Wright, A. F., Wilson, J. F., Campbell, H., and Gyllensten, U. 2012. Genetic adaptation of  
520 fatty-acid metabolism: a human-specific haplotype increasing the biosynthesis of long-chain omega-3  
521 and omega-6 fatty acids. *American journal of human genetics*, 90(5): 809–820.
- 522 Barrios-Correa, A. A., Estrada, J. A., and Contreras, I. 2018. Leptin Signaling in the Control of  
523 Metabolism and Appetite: Lessons from Animal Models. *Journal of Molecular Neuroscience*, 66(3):  
524 390–402.
- 525 Benton, M. L., Abraham, A., LaBella, A. L., Abbot, P., Rokas, A., and Capra, J. A. 2021. The influence  
526 of evolutionary history on human health and disease. *Nature Reviews Genetics*, 22(5): 269–283.
- 527 Berg, J. J. and Coop, G. 2014. A Population Genetic Signal of Polygenic Adaptation. *PLoS Genetics*,  
528 10(8).
- 529 Buckley, M. T., Racimo, F., Allentoft, M. E., Jensen, M. K., Jonsson, A., Huang, H., Hormozdiari, F.,  
530 Sikora, M., Marnetto, D., Eskin, E., Jørgensen, M. E., Grarup, N., Pedersen, O., Hansen, T., Kraft,  
531 P., Willerslev, E., and Nielsen, R. 2017. Selection in Europeans on Fatty Acid Desaturases Associated  
532 with Dietary Changes. *Molecular biology and evolution*, 34(6): 1307–1318.
- 533 Catassi, C. and Catassi, G. N. 2018. The puzzling relationship between human leukocyte antigen HLA  
534 genes and celiac disease. *Saudi journal of gastroenterology : official journal of the Saudi Gastroen-  
535 terology Association*, 24(5): 257–258.
- 536 Chaki, M., Sengupta, M., Mondal, M., Bhattacharya, A., Mallick, S., Bhadra, R., Consortium, I. G. V.,  
537 and Ray, K. 2011. Molecular and Functional Studies of Tyrosinase Variants Among Indian Oculocu-  
538 taneous Albinism Type 1 Patients. *Journal of Investigative Dermatology*, 131(1): 260–262.
- 539 Chen, J., Swofford, R., Johnson, J., Cummings, B. B., Rogel, N., Lindblad-Toh, K., Haerty, W., Di  
540 Palma, F., and Regev, A. 2018. A quantitative framework for characterizing the evolutionary history  
541 of mammalian gene expression. *Genome Research*, 29(1): 53–63.
- 542 Chou, S., Upton, H., Bao, K., Schulze-Gahmen, U., Samelson, A. J., He, N., Nowak, A., Lu, H., Krogan,  
543 N. J., Zhou, Q., and Alber, T. 2013. HIV-1 Tat recruits transcription elongation factors dispersed  
544 along a flexible AFF4 scaffold. *Proceedings of the National Academy of Sciences of the United States  
545 of America*, 110(2): E123–31.



- 546 Cohen, L., Henzel, W. J., and Baeuerle, P. A. 1998. IKAP is a scaffold protein of the IkappaB kinase  
547 complex. *Nature*, 395(6699): 292–296.
- 548 Colbran, L. L., Gamazon, E. R., Zhou, D., Evans, P., Cox, N. J., and Capra, J. A. 2019. Inferred  
549 divergent gene regulation in archaic hominins reveals potential phenotypic differences. *Nature Ecology  
550 & Evolution*.
- 551 Console, L., Scalise, M., Tonazzi, A., Giangregorio, N., and Indiveri, C. 2018. Characterization of  
552 Exosomal SLC22A5 (OCTN2) carnitine transporter. *Scientific Reports*, 8(1): 3758.
- 553 Das, S., Forer, L., Schönherr, S., Sidore, C., Locke, A. E., Kwong, A., Vrieze, S. I., Chew, E. Y., Levy,  
554 S., McGue, M., Schlessinger, D., Stambolian, D., Loh, P.-R., Iacono, W. G., Swaroop, A., Scott, L. J.,  
555 Cucca, F., Kronenberg, F., Boehnke, M., Abecasis, G. R., and Fuchsberger, C. 2016. Next-generation  
556 genotype imputation service and methods. *Nature genetics*, 48(10): 1284–1287.
- 557 De Silvestri, A., Capittini, C., Poddighe, D., Valsecchi, C., Marseglia, G., Tagliacarne, S. C., Scotti, V.,  
558 Rebuffi, C., Pasi, A., Martinetti, M., and Tinelli, C. 2018. HLA-DQ genetics in children with celiac  
559 disease: a meta-analysis suggesting a two-step genetic screening procedure starting with HLA-DQ  $\beta$   
560 chains. *Pediatric Research*, 83(3): 564–572.
- 561 Dehghani, M. R., Mehrjardi, M. Y. V., Dilaver, N., Tajamolian, M., Enayati, S., Ebrahimi, P., Amoli,  
562 M. M., Farooqi, S., and Maroofian, R. 2018. Potential role of gender specific effect of leptin receptor  
563 deficiency in an extended consanguineous family with severe early-onset obesity. *European Journal of  
564 Medical Genetics*, 61(8): 465–467.
- 565 Devlin, B. and Roeder, K. 1999. Genomic Control for Association Studies. *Biometrics*, 55(4): 997–1004.
- 566 D’Mello, S. A. N., Finlay, G. J., Baguley, B. C., and Askarian-Amiri, M. E. 2016. Signaling Pathways  
567 in Melanogenesis. *International journal of molecular sciences*, 17(7): 1144.
- 568 Eisenberg, E. and Levanon, E. Y. 2003. Human housekeeping genes are compact. *Trends in Genetics*,  
569 19(7): 362–365.
- 570 Eisenberg, E. and Levanon, E. Y. 2013. Human housekeeping genes, revisited. *Trends in Genetics*,  
571 29(10): 569–574.
- 572 Enard, D., Cai, L., Gwennap, C., and Petrov, D. A. 2016. Viruses are a dominant driver of protein  
573 adaptation in mammals. *eLife*, 5: e12469.
- 574 Engelken, J., Espadas, G., Mancuso, F. M., Bonet, N., Scherr, A.-L., Jiménez-Álvarez, V., Codina-  
575 Solà, M., Medina-Stacey, D., Spataro, N., Stoneking, M., Calafell, F., Sabidó, E., and Bosch, E.  
576 2016. Signatures of Evolutionary Adaptation in Quantitative Trait Loci Influencing Trace Element  
577 Homeostasis in Liver. *Molecular Biology and Evolution*, 33(3): 738–754.
- 578 Farooqi, I. S., Wangensteen, T., Collins, S., Kimber, W., Matarese, G., Keogh, J. M., Lank, E., Bottom-  
579 ley, B., Lopez-Fernandez, J., Ferraz-Amaro, I., Dattani, M. T., Ercan, O., Myhre, A. G., Retterstol,  
580 L., Stanhope, R., Edge, J. A., McKenzie, S., Lessan, N., Ghodsi, M., De Rosa, V., Perna, F., Fontana,  
581 S., Barroso, I., Undlien, D. E., and O’Rahilly, S. 2007. Clinical and molecular genetic spectrum of  
582 congenital deficiency of the leptin receptor. *The New England journal of medicine*, 356(3): 237–247.
- 583 Field, Y., Boyle, E. A., Telis, N., Gao, Z., Gaulton, K. J., Golan, D., Yengo, L., Rocheleau, G., Froguel,  
584 P., McCarthy, M. I., and Pritchard, J. K. 2016. Detection of human adaptation during the past 2000  
585 years. *Science (New York, N.Y.)*, 354(6313): 760–764.

- 586 Flanagan, J. L., Simmons, P. A., Vehige, J., Willcox, M. D. P., and Garrett, Q. 2010. Role of carnitine  
587 in disease. *Nutrition & Metabolism*, 7(1): 30.
- 588 Fu, Q., Hajdinjak, M., Moldovan, O. T., Constantin, S., Mallick, S., Skoglund, P., Patterson, N., Roh-  
589 land, N., Lazaridis, I., Nickel, B., Viola, B., Prüfer, K., Meyer, M., Kelso, J., Reich, D., and Pääbo, S.  
590 2015. An early modern human from Romania with a recent Neanderthal ancestor. *Nature*, 524(7564):  
591 216–219.
- 592 Gamazon, E. R., Wheeler, H. E., Shah, K. P., Mozaffari, S. V., Aquino-Michaels, K., Carroll, R. J.,  
593 Eyster, A. E., Denny, J. C., GTEx Consortium, Nicolae, D. L., Cox, N. J., and Im, H. K. 2015. A  
594 gene-based association method for mapping traits using reference transcriptome data. *Nat Genet*,  
595 47(9): 1091–1098.
- 596 Ghodsinejad Kalahroudi, V., Kamalidehghan, B., Arasteh Kani, A., Aryani, O., Tondar, M., Ah-  
597 madipour, F., Chung, L. Y., and Houshmand, M. 2014. Two Novel Tyrosinase (TYR) Gene Mutations  
598 with Pathogenic Impact on Oculocutaneous Albinism Type 1 (OCA1). *PLOS ONE*, 9(9): e106656.
- 599 Goude, G. and Fontugne, M. 2016. Carbon and nitrogen isotopic variability in bone collagen during the  
600 Neolithic period: Influence of environmental factors and diet. *Journal of Archaeological Science*, 70:  
601 117–131.
- 602 Grossman, S. R., Andersen, K. G., Shlyakhter, I., Tabrizi, S., Winnicki, S., Yen, A., Park, D. J.,  
603 Griesemer, D., Karlsson, E. K., Wong, S. H., Cabili, M., Adegbola, R. A., Bamezai, R. N., Hill, A. V.,  
604 Vannberg, F. O., Rinn, J. L., Lander, E. S., Schaffner, S. F., and Sabeti, P. C. 2013. Identifying Recent  
605 Adaptations in Large-Scale Genomic Data. *Cell*, 152(4): 703–713.
- 606 Guillin, O. M., Vindry, C., Ohlmann, T., and Chavatte, L. 2019. Selenium, Selenoproteins and Viral  
607 Infection.
- 608 Haak, W., Lazaridis, I., Patterson, N., Rohland, N., Mallick, S., Llamas, B., Brandt, G., Nordenfelt, S.,  
609 Harney, E., Stewardson, K., Fu, Q., Mittnik, A., Bánffy, E., Economou, C., Francken, M., Friederich,  
610 S., Pena, R. G., Hallgren, F., Khartanovich, V., Khokhlov, A., Kunst, M., Kuznetsov, P., Meller, H.,  
611 Mochalov, O., Moiseyev, V., Nicklisch, N., Pichler, S. L., Risch, R., Rojo Guerra, M. A., Roth, C.,  
612 Szécsényi-Nagy, A., Wahl, J., Meyer, M., Krause, J., Brown, D., Anthony, D., Cooper, A., Alt, K. W.,  
613 and Reich, D. 2015. Massive migration from the steppe was a source for Indo-European languages in  
614 Europe. *Nature*, 522(7555): 207–211.
- 615 Hancock, A. M., Witonsky, D. B., Gordon, A. S., Eshel, G., Pritchard, J. K., Coop, G., and Di Rienzo,  
616 A. 2008. Adaptations to climate in candidate genes for common metabolic disorders. *PLoS genetics*,  
617 4(2): e32–e32.
- 618 He, N., Liu, M., Hsu, J., Xue, Y., Chou, S., Burlingame, A., Krogan, N. J., Alber, T., and Zhou, Q. 2010.  
619 HIV-1 Tat and host AFF4 recruit two transcription elongation factors into a bifunctional complex for  
620 coordinated activation of HIV-1 transcription. *Molecular cell*, 38(3): 428–438.
- 621 Irving-Pease, E. K., Muktupavela, R., Dannemann, M., and Racimo, F. 2021. Quantitative paleogenetics:  
622 what can ancient dna tell us about complex trait evolution? *arXiv*.
- 623 Ju, D. and Mathieson, I. 2020. The evolution of skin pigmentation associated variation in West Eurasia.  
624 *bioRxiv*, page 2020.05.08.085274.

- 625 Kentish, S. J., Wittert, G. A., Blackshaw, L. A., and Page, A. J. 2013. A chronic high fat diet alters the  
626 homologous and heterologous control of appetite regulating peptide receptor expression. *Peptides*, 46:  
627 150–158.
- 628 Lamason, R. L., Mohideen, M.-A. P. K., Mest, J. R., Wong, A. C., Norton, H. L., Aros, M. C., Juryneec,  
629 M. J., Mao, X., Humphreville, V. R., Humbert, J. E., Sinha, S., Moore, J. L., Jagadeeswaran, P., Zhao,  
630 W., Ning, G., Makalowska, I., McKeigue, P. M., O'donnell, D., Kittles, R., Parra, E. J., Mangini, N. J.,  
631 Grunwald, D. J., Shriver, M. D., Canfield, V. A., and Cheng, K. C. 2005. SLC24A5, a putative cation  
632 exchanger, affects pigmentation in zebrafish and humans. *Science (New York, N.Y.)*, 310(5755): 1782–  
633 1786.
- 634 Lek, M., Karczewski, K. J., Minikel, E. V., Samocha, K. E., Banks, E., Fennell, T., O'Donnell-Luria,  
635 A. H., Ware, J. S., Hill, A. J., Cummings, B. B., Tukiainen, T., Birnbaum, D. P., Kosmicki, J. A.,  
636 Duncan, L. E., Estrada, K., Zhao, F., Zou, J., Pierce-Hoffman, E., Berghout, J., Cooper, D. N.,  
637 Deflaux, N., DePristo, M., Do, R., Flannick, J., Fromer, M., Gauthier, L., Goldstein, J., Gupta, N.,  
638 Howrigan, D., Kiezun, A., Kurki, M. I., Moonshine, A. L., Natarajan, P., Orozco, L., Peloso, G. M.,  
639 Poplin, R., Rivas, M. A., Ruano-Rubio, V., Rose, S. A., Ruderfer, D. M., Shakir, K., Stenson, P. D.,  
640 Stevens, C., Thomas, B. P., Tiao, G., Tusie-Luna, M. T., Weisburd, B., Won, H.-H., Yu, D., Altshuler,  
641 D. M., Ardissino, D., Boehnke, M., Danesh, J., Donnelly, S., Elosua, R., Florez, J. C., Gabriel, S. B.,  
642 Getz, G., Glatt, S. J., Hultman, C. M., Kathiresan, S., Laakso, M., McCarroll, S., McCarthy, M. I.,  
643 McGovern, D., McPherson, R., Neale, B. M., Palotie, A., Purcell, S. M., Saleheen, D., Scharf, J. M.,  
644 Sklar, P., Sullivan, P. F., Tuomilehto, J., Tsuang, M. T., Watkins, H. C., Wilson, J. G., Daly, M. J.,  
645 MacArthur, D. G., and Consortium, E. A. 2016. Analysis of protein-coding genetic variation in 60,706  
646 humans. *Nature*, 536: 285.
- 647 Li, R., Chen, Y., Ritchie, M. D., and Moore, J. H. 2020. Electronic health records and polygenic risk  
648 scores for predicting disease risk. *Nature Reviews Genetics*, 21(8): 493–502.
- 649 Liao, Y., Wang, J., Jaehnig, E. J., Shi, Z., and Zhang, B. 2019. WebGestalt 2019: gene set analysis  
650 toolkit with revamped UIs and APIs. *Nucleic acids research*, 47(W1): W199–W205.
- 651 Loos, R. J. F., Rankinen, T., Chagnon, Y., Tremblay, A., Pérusse, L., and Bouchard, C. 2006. Poly-  
652 morphisms in the leptin and leptin receptor genes in relation to resting metabolic rate and respiratory  
653 quotient in the Québec Family Study. *International Journal of Obesity*, 30(1): 183–190.
- 654 Luca, F., Perry, G. H., and Di Rienzo, A. 2010. Evolutionary adaptations to dietary changes. *Annual  
655 review of nutrition*, 30: 291–314.
- 656 Machiela, M. J. and Chanock, S. J. 2015. LDlink: a web-based application for exploring population-  
657 specific haplotype structure and linking correlated alleles of possible functional variants. *Bioinformatics  
658 (Oxford, England)*, 31(21): 3555–3557.
- 659 Mancini, A., Koch, A., Whetton, A. D., and Tamura, T. 2004. The M-CSF receptor substrate and  
660 interacting protein FMIP is governed in its subcellular localization by protein kinase C-mediated  
661 phosphorylation, and thereby potentiates M-CSF-mediated differentiation. *Oncogene*, 23(39): 6581–  
662 6589.
- 663 Mann, N. J. 2018. A brief history of meat in the human diet and current health implications. *Meat  
664 Science*, 144: 169–179.
- 665 Marciniak, S. and Perry, G. H. 2017. Harnessing ancient genomes to study the history of human adap-  
666 tation. *Nature Reviews Genetics*, 18(11): 659–674.

- 667 Mathieson, S. and Mathieson, I. 2018. FADS1 and the timing of human adaptation to agriculture.  
668 *Molecular Biology and Evolution*, 35(12): 2957–2970.
- 669 Norman, C. S., O’Gorman, L., Gibson, J., Pengelly, R. J., Baralle, D., Ratnayaka, J. A., Griffiths, H.,  
670 Rose-Zerilli, M., Ranger, M., Bunyan, D., Lee, H., Page, R., Newall, T., Shawkat, F., Mattocks, C.,  
671 Ward, D., Ennis, S., and Self, J. E. 2017. Identification of a functionally significant tri-allelic genotype  
672 in the Tyrosinase gene (TYR) causing hypomorphic oculocutaneous albinism (OCA1B). *Scientific*  
673 *Reports*, 7(1): 4415.
- 674 Okoro, P. C., Schubert, R., Guo, X., Johnson, W. C., Rotter, J. I., Hoeschele, I., Liu, Y., Im, H. K., Luke,  
675 A., Dugas, L. R., and Wheeler, H. E. 2021. Transcriptome prediction performance across machine  
676 learning models and diverse ancestries. *Human Genetics and Genomics Advances*.
- 677 Olsson, O. and Paik, C. 2016. Long-run cultural divergence: Evidence from the Neolithic Revolution.  
678 *Journal of Development Economics*, 122: 197–213.
- 679 Petty, L. E., Highland, H. M., Gamazon, E. R., Hu, H., Karhade, M., Chen, H.-H., de Vries, P. S.,  
680 Grove, M. L., Aguilar, D., Bell, G. I., Huff, C. D., Hanis, C. L., Doddapaneni, H., Munzy, D. M.,  
681 Gibbs, R. A., Ma, J., Parra, E. J., Cruz, M., Valladares-Salgado, A., Arking, D. E., Barbeira, A.,  
682 Im, H. K., Morrison, A. C., Boerwinkle, E., and Below, J. E. 2019. Functionally oriented analysis of  
683 cardiometabolic traits in a trans-ethnic sample. *Human Molecular Genetics*, 00(00): 1–13.
- 684 Pierini, F. and Lenz, T. L. 2018. Divergent Allele Advantage at Human MHC Genes: Signatures of Past  
685 and Ongoing Selection. *Molecular Biology and Evolution*, 35(9): 2145–2158.
- 686 Rees, J. S., Castellano, S., and Andrés, A. M. 2020. The Genomics of Human Local Adaptation. *Trends*  
687 *in Genetics*, 36(6): 415–428.
- 688 Skoglund, P. and Mathieson, I. 2018. Ancient Human Genomics: The First Decade. *Annu. Rev. Genom.*  
689 *Hum. Genet*, 198(April): 1–824.
- 690 Soejima, M. and Koda, Y. 2007. Population differences of two coding SNPs in pigmentation-related  
691 genes SLC24A5 and SLC45A2. *International journal of legal medicine*, 121(1): 36–39.
- 692 Sturm, R. A. and Duffy, D. L. 2012. Human pigmentation genes under environmental selection. *Genome*  
693 *Biology*, 13(9): 248.
- 694 Tamura, T., Mancini, A., Joos, H., Koch, A., Hakim, C., Dumanski, J., Weidner, K. M., and Niemann,  
695 H. 1999. FMIP, a novel Fms-interacting protein, affects granulocyte/macrophage differentiation. *Oncog-*  
696 *ene*, 18(47): 6488–6495.
- 697 The 1000 Genomes Project Consortium 2015. A global reference for human genetic variation. *Nature*,  
698 526(7571): 68–74.
- 699 Voight, B. F., Kudaravalli, S., Wen, X., and Pritchard, J. K. 2006. A Map of Recent Positive Selection  
700 in the Human Genome. *PLOS Biology*, 4(3): e72.
- 701 Weiss, C. V., Harshman, L., Inoue, F., Fraser, H. B., Petrov, D. A., Ahituv, N., and Gokhman, D. 2021.  
702 The cis-regulatory effects of modern human-specific variants. *Elife*, 10.
- 703 White, L., Romagné, F., Müller, E., Erlebach, E., Weihmann, A., Parra, G., Andrés, A. M., and  
704 Castellano, S. 2015. Genetic Adaptation to Levels of Dietary Selenium in Recent Human History.  
705 *Molecular Biology and Evolution*, 32(6): 1507–1518.

- 706 Wilde, S., Timpson, A., Kirsanow, K., Kaiser, E., Kayser, M., Unterländer, M., Hollfelder, N., Potekhina,  
707 I. D., Schier, W., Thomas, M. G., and Burger, J. 2014. Direct evidence for positive selection of skin,  
708 hair, and eye pigmentation in Europeans during the last 5,000 y. *Proceedings of the National Academy  
709 of Sciences*, page 201316513.
- 710 Ye, K., Gao, F., Wang, D., Bar-Yosef, O., and Keinan, A. 2017. Dietary adaptation of FADS genes in  
711 Europe varied across time and geography. *Nature Ecology & Evolution*, 1(7): 167.
- 712 Zhang, T., Choi, J., Kovacs, M., Shi, J., Xu, M., Goldstein, A., Iles, M., Duffy, D., MacGregor, S.,  
713 Amundadottir, L., Law, M., Loftus, S., Pavan, W., and Brown, K. 2017. Cell-type specific eQTL  
714 of primary melanocytes facilitates identification of melanoma susceptibility genes. *Cell-type-specific  
715 eQTL of primary melanocytes facilitates identification of melanoma susceptibility genes*, page 231423.
- 716 Zheng, W.-S., He, Y.-X., Cui, C.-Y., Ouzhu, L., Deji, Q., Peng, Y., Bai, C.-J., Duoji, Z., Gongga, L.,  
717 Bian, B., Baima, K., Pan, Y.-Y., Qu, L., Kang, M., Ciren, Y., Baima, Y., Guo, W., Yang, L., Zhang,  
718 H., Zhang, X.-M., Guo, Y.-B., Xu, S.-H., Chen, H., Zhao, S.-G., Cai, Y., Liu, S.-M., Wu, T.-Y., Qi,  
719 X.-B., and Su, B. 2017. EP300 contributes to high-altitude adaptation in Tibetans by regulating nitric  
720 oxide production. *Zoological research*, 38(3): 163–170.
- 721 Zhou, D., Jiang, Y., Zhong, X., Cox, N. J., Liu, C., and Gamazon, E. R. 2020. A unified framework for  
722 joint-tissue transcriptome-wide association and Mendelian randomization analysis. *Nature genetics*.
- 723 Zhu, H. and Zhou, X. 2020. Transcriptome-wide association studies: a view from Mendelian randomiza-  
724 tion. *Quantitative Biology*.



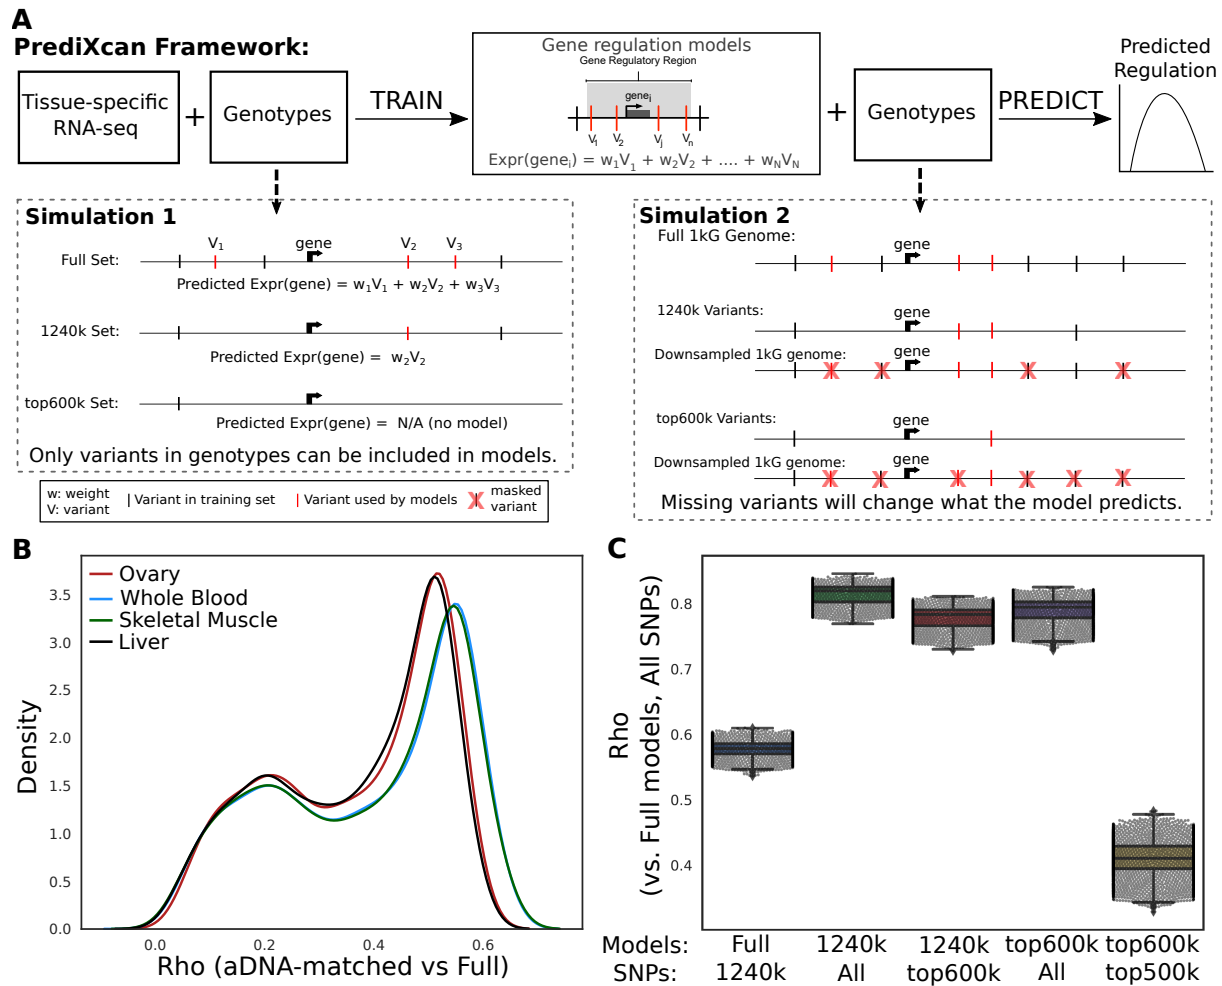

**Figure 1: Gene regulatory prediction models can be trained for application to low-coverage ancient DNA.** (a) Schematic of the framework for training and testing PrediXcan models. PrediXcan consists of statistical models for imputing genetic regulation of gene expression that are trained on genetic variants and normalized transcriptomes from diverse tissues collected as part of the GTEx Project. For each gene, PrediXcan considers genetic variants within 1 Mb of the gene (grey box) and uses elastic net regression to learn a combination of variants and weights to predict variance in its expression across individuals. Variants included in the final model are illustrated by red vertical lines. (b) To evaluate the potential for gene regulatory prediction using aDNA, we performed several analyses. First, we evaluated the effects of using three different variants for model training: Full (all common variants in GTEx), 1240k (all variants in the aDNA 1240k capture set), and top600k (the 600k most representative variants from the 1240k capture set; see Methods). We also simulated the presence of missing data in the prediction phase by masking variants from genomes from the 1000 Genomes project such that only variants from each of the 3 sets (Full, 1240k, top600k) were available for use in prediction. (c) Distribution of Spearman  $\rho$  between predictions per individual in four tissues (Skeletal Muscle, Whole Blood, Liver, Ovary) when considering the complete genome vs. 1240k-matched simulated ancient genomes. (d) Spearman  $\rho$  between predictions from a range of targeted models on down-sampled genomes to the Full PrediXcan models applied to all variants available for 1kG individuals. Models were trained on different variant subsets (x-axis, top row: All, 1240k, top600k) and applied to complete or downsampled 1kG genomes (x-axis, bottom row: All, 1240k, top600k). There is one point per individual sample.

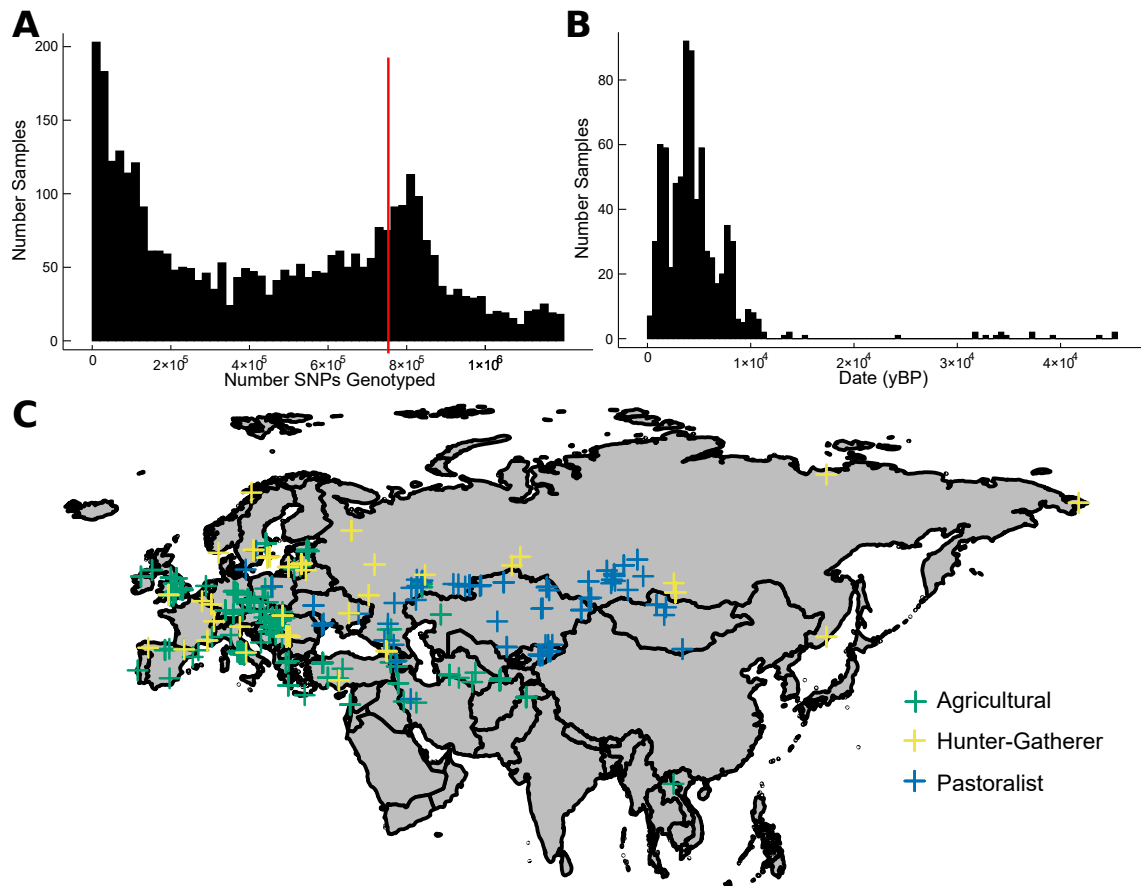

Figure 2: **Attributes of ancient humans considered in this study.** (a) Distribution of the number of variants with genotype call in the aDNA samples. The maximum is 1,233,013, the number of SNPs on the 1240k genotyping chip. We analyzed individuals in the 3rd quartile or above (red line, 771,029 SNPs). (b) Distribution of the age of 490 Eurasian samples analyzed in years before present (yBP). (c) We assigned ancient Eurasians with sufficient genetic data to three lifestyles: Green = agriculturalist, Blue = pastoralist, Yellow = hunter-gatherer.

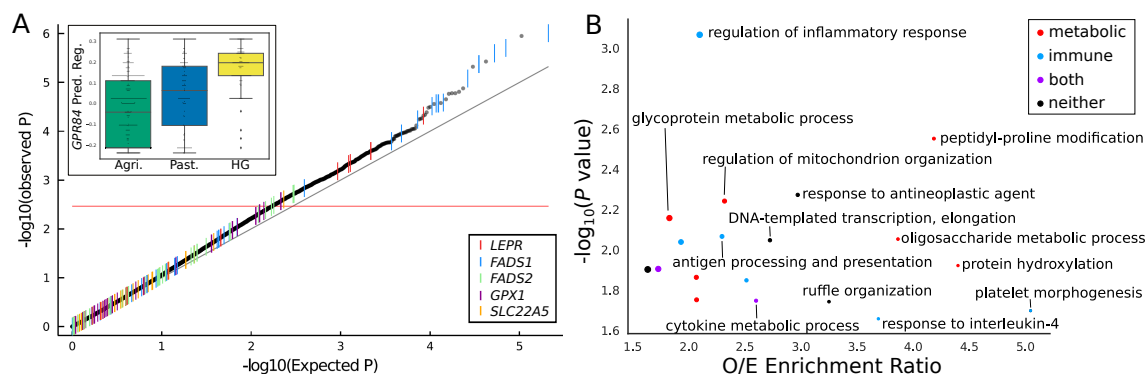

Figure 3: **Immune and metabolic genes are among the most diverged between ancient lifestyle groups.** (a) QQ plot for all gene regulation models in all tissues. Observed  $P$ -values are calculated after GC correction. The 500 most divergently regulated genes have at least 1 model above the red line. Inset: Predicted Regulation of *GPR84* in Adrenal Gland. (b) The most-enriched Gene Ontology (GO) terms among the 500 most diverged genes. Point size scales with number of diverged genes in each category (range 3-24).

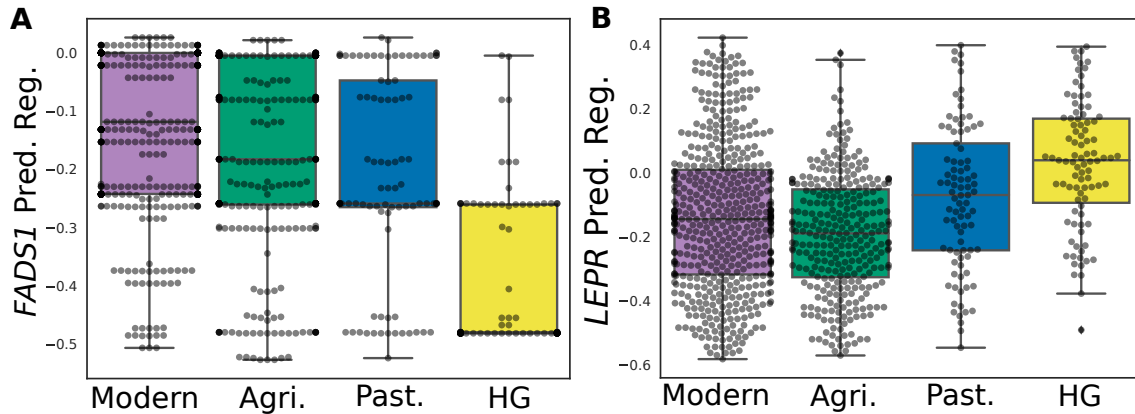

Figure 4: **Ancient humans from different lifestyles had significant differences in regulation of key diet genes** (a) *FADS1* shows divergence in predicted regulation in Subcutaneous Adipose tissue between lifestyles (Kruskal-Wallis  $P = 5.7 \times 10^{-24}$ ), as well as in eight other tissues. (b) *LEPR* regulation in Cerebellum is divergent across lifestyles (Kruskal-Wallis  $P = 3.6 \times 10^{-17}$ ). Plotted with 503 present-day Europeans for comparison. Purple = Present-day Europeans, Green = agriculturalists, Blue = pastoralists, Yellow = hunter-gatherers.

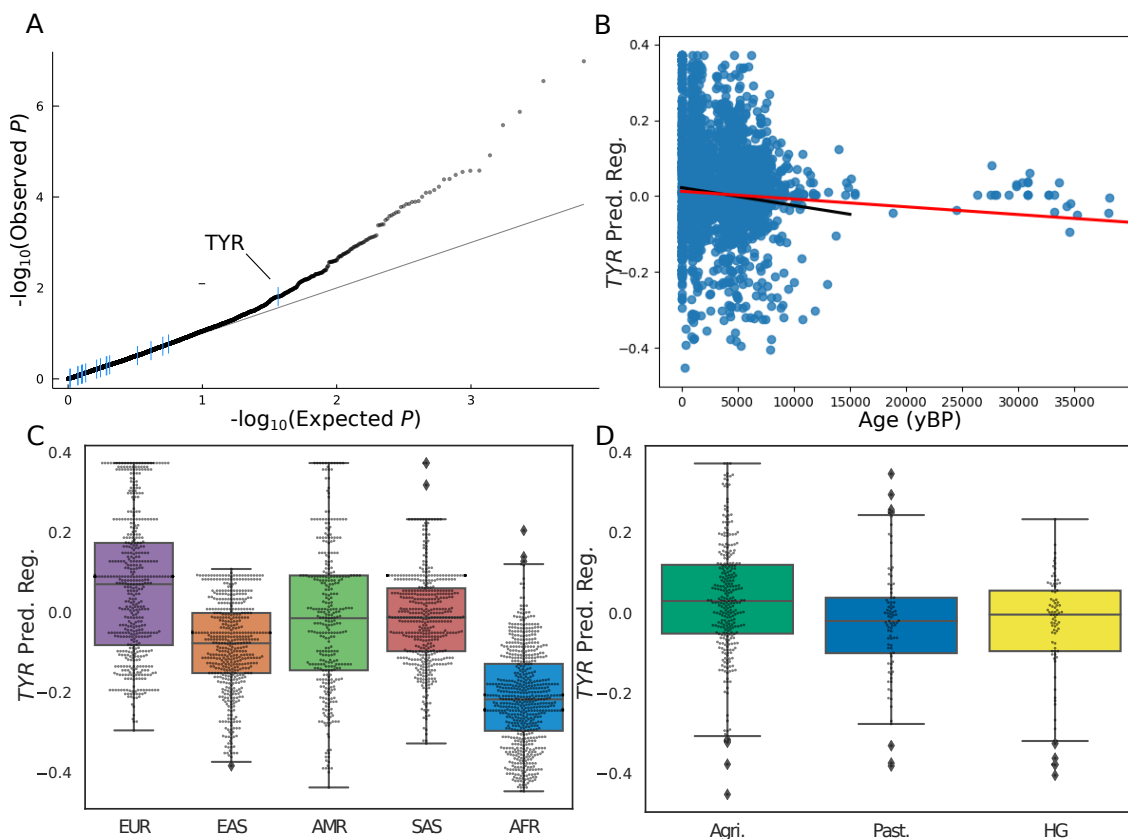

Figure 5: **Most skin pigmentation genes show little change in regulation in the last 38,000 years in Europeans** (a) Q-Q plot with  $P$ -values from linear regressions of date vs. predicted regulation for all modeled genes in melanocytes (Methods). The 17 skin pigmentation are highlighted in blue. (b) Predicted regulation of *TYR* increases over time in Europeans. The red line shows a regression calculated over all individuals, and the black regression line was calculated only over individuals < 15,000 yBP. (c) *TYR* predicted regulation in present-day 1kG populations, separated by continent of ancestry. (d) *TYR* predicted regulation in ancient Eurasians, split by lifestyle. Green = agriculturalists, Blue = pastoralists, Yellow = hunter-gatherers.

## Supplementary Materials

### Evaluating the robustness of gene regulation prediction models to missing data

There are several challenges involved in adapting PrediXcan to be applied to ancient DNA. First, ancient individuals may be genetically diverged from the populations used to train the prediction models. Recent evaluations of the portability of these models across modern human populations have shown that while their accuracy decreases when applied across human populations, most models maintain substantial predictive ability that enables the discovery of meaningful biological associations Okoro *et al.* (2021); Petty *et al.* (2019). We have also demonstrated that this approach can be applied to archaic hominin genomes Colbran *et al.* (2019). The ancient Eurasian individuals we analyze here are less genetically diverged from the training population than modern African-ancestry individuals or archaic hominins. In addition, we stress that these models do not aim to predict gene expression itself, but rather to quantify the common variant mediated component of gene regulation, and thus, they provide an means to detect shifts in regulatory architecture.

Second, available aDNA data varies in coverage, depth, and quality. This creates a trade-off between number of individuals available for analysis and the quality of their genotyping. In addition, many other potential applications of PrediXcan involve populations that differ from the training populations. In these situations, even if the populations are of similar ancestry, all the variants the models use to predict gene expression may not be assayed in the population of interest. Therefore it is of great interest to understand how PrediXcan behaves under these conditions with varying levels of missing variant data, and develop ways to optimize its performance in such cases.

To better understand and quantify these patterns, we first trained PrediXcan models on expression data and all available variants in GTEx v8 (“Full models”). We then applied these prediction models to all variants and downsampled sets of variants from individuals with whole-genome sequencing from the 1000 Genomes Project (1kG) The 1000 Genomes Project Consortium (2015). This enabled us to evaluate how predictions change with missing variant data. We selected nine thresholds for percentage of missing SNPs (5%-45% missing) and downsampled 20 random European individuals per threshold (Supplementary Fig. 1A). The agreement between the predictions on downsampled genomes and full genomes was strongly correlated with the percentage of SNPs missing (Supplementary Fig. 2B). However, Spearman correlations were above 0.75 for all comparisons, even when genomes were missing as many as 45% of their SNPs. This suggests that model accuracy can be maintained even at relatively high rates of missingness, likely due to LD between variants.

While this is encouraging, missing SNPs may not be randomly distributed throughout the genome in some applications. To evaluate how biases in missingness across the genome could affect these results, we repeated the comparison described above. However, instead of randomly downsampling SNPs, we matched the patterns of missingness to the dataset (Fig. 1B) of particular interest to us: 3383 aDNA samples, with widely varying numbers of missing SNPs (Supplementary Fig. 2C). Overall, the correlations were much lower (median Spearman  $\rho=0.39$ ; Fig. 1B). This is unsurprising given that the aDNA samples were obtained using targeted capture, while the model training data was based on whole genome sequencing. At most, the aDNA samples had 714,959 SNPs, while the training data had over 5 million (i.e. 87% missing). This indicates that, while models can tolerate a fair amount of missing data, the missingness caused by a mismatch between genotyped SNPs and training SNPs is likely to substantially decrease prediction accuracy.

We next evaluated whether imputation performance could be improved in our aDNA application by customizing the training data to contain only variants that will be available in the application data. This

770 step ensures that any variants used that are not assayed in the application data are not used in model  
771 training. Thus, we retrained PrediXcan models using GTEx v8, but only considered the SNPs present  
772 in the 1240k capture set that is commonly used in aDNA studies (“1240k set”; Supplementary Fig. 1B).  
773 This resulted in 714,959 variants for model training (the number that were successfully lifted over to  
774 the hg38 genome build), as opposed to the 5,310,489 variants available for the full models based on  
775 whole genomes. Because most of the genotyped aDNA samples tend to be low-coverage (Supplementary  
776 Fig. 2C), we also tested the use-case where we chose the SNPs in the dataset most likely to provide  
777 information. To do this, we ranked SNPs by the number of samples in the 3383 ancient samples used  
778 above with genotype calls, and weighted that count by the overall coverage of those samples. We then  
779 chose the 600,000 SNPs with the best ranking (“top600k set”), thereby prioritizing SNPs that were  
780 frequently present in the best-quality samples.

781 Training models on fewer SNPs resulted in a small decrease in the variance explained in gene expres-  
782 sion for some genes (Fig. 3), and fewer significant models were constructed in each tissue (7184, 6587,  
783 and 5196 significant models for Full, 1240k, and top600k respectively in Whole Blood). This also resulted  
784 in inconsistent predictions when models were applied to the same individuals (Fig. 4). This behaviour  
785 is caused by the decrease in available SNPs for modelling, which is reflected in the smaller models built  
786 in the 1240k and top600k sets (Fig. 5A,C). While many genes continued to be successfully modelled by  
787 the targeted models, restricting to fewer SNPs resulted in a loss of genes for which the Full models had  
788 a lower  $r^2$ .

789 While these results demonstrate that using more SNPs during training results in more numerous  
790 and accurate models, this does not take into account the presence of missing data in the genomes that  
791 will be used for predictions. Therefore the outstanding question is whether model performance is more  
792 consistent when trained on fewer SNPs without a large missing data percentage, or if it is better to  
793 include more SNPs during training, but allow more missing data during application. To answer this, we  
794 applied our targeted models described above to 1kG genomes downsampled to match the various sets of  
795 SNPs used during model training and compared their agreement with the full models applied to the full  
796 genomes. For the top600k models, we further downsampled the application set to 500k SNPs using the  
797 same methodology.

798 In line with our initial findings, we found that all models lost consistency when applied to genomes  
799 with missing SNPs (Fig. 1C). The 1240k models maintained the highest agreement with the Full mod-  
800 els when applied to incomplete data (median  $\rho=0.78$ , vs 0.58 and 0.41 for Full and top600k models,  
801 respectively), though they also had a larger variance in agreement. The Full models likely did worse  
802 because there was a much larger drop in the number of SNPs available compared to training, while  
803 the top600k models’ reliance on fewer SNPs may have increased their susceptibility to missing SNPs.  
804 This suggests that a balance between targeting model training for the dataset in question and allowing  
805 some missingness is the best course of action. For analyses presented in this paper, we therefore applied  
806 models targeted to the 1240k variant set to ancient individuals with relatively high coverage (above the  
807 3rd quartile among all samples available).

## 808 **Supplementary Figures**



### Random Simulations:

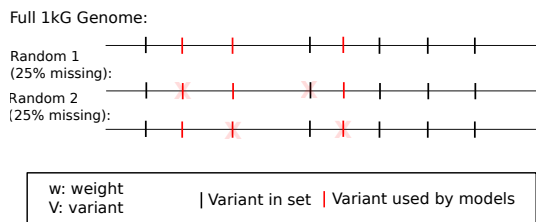

### Matched Simulations:

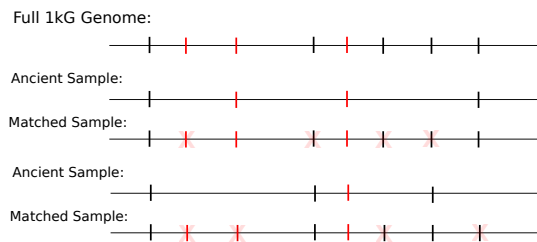

Figure 1: **Schematic of process for generating random and matched simulated genomes.** Starting from a complete genome from 1kG, for the random simulations we mask a random number of variants corresponding to the specified missing percentage. For the matched simulations, we pair a complete modern genome and an ancient genome, and mask any variants in the modern genome that are not present in the ancient one. (b) Schematic of creating targeted variants sets to train PrediXcan models.

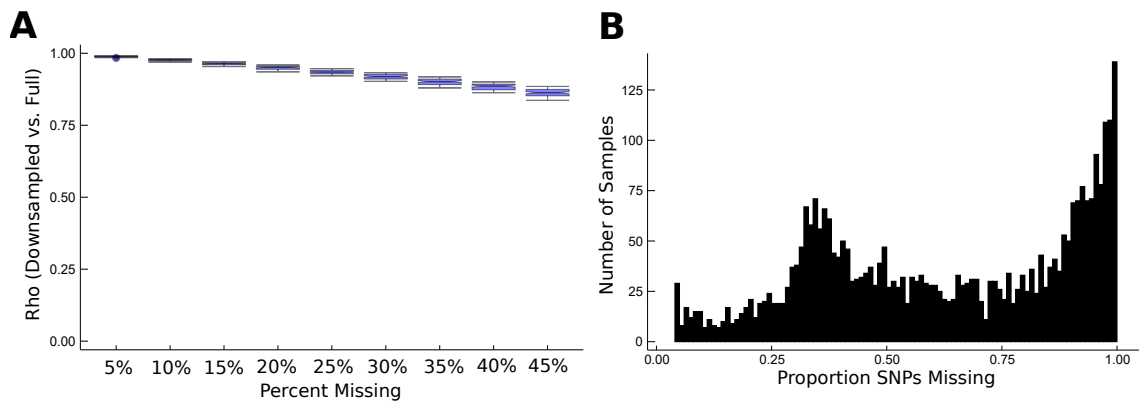

Figure 2: **Missing variants affect PrediXcan performance.** (a) The Spearman  $\rho$  between predictions in four tissues calculated for the complete genome vs. random simulations decreases as the percentage of missing variants increases, but remains high even with 45% of variants masked. (c) Distribution of the proportion of missing variants in the aDNA data compared to all variants included in 1kG.

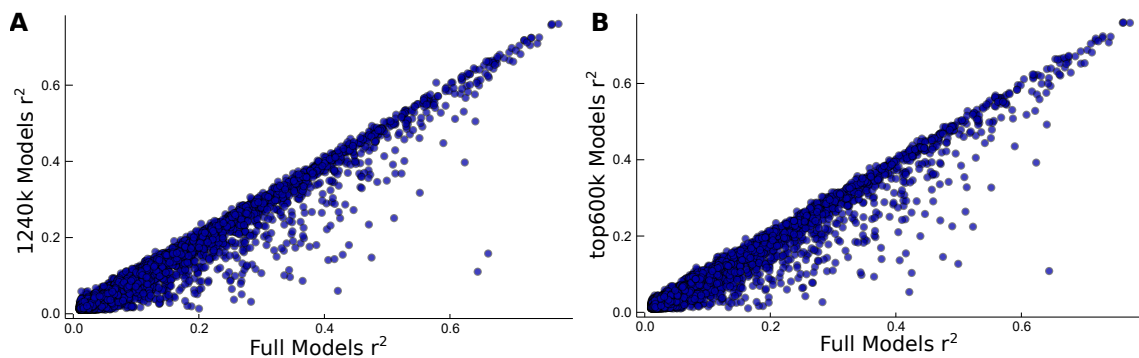

Figure 3: **Models trained on fewer SNPs explain less variance in gene expression.** Scatterplots of training  $r^2$  for (a) 1240k models and (b) top600k models vs. Full models in Whole Blood. Other tissues tested matched trends.  $r^2$  is calculated over observed vs. predicted expression.

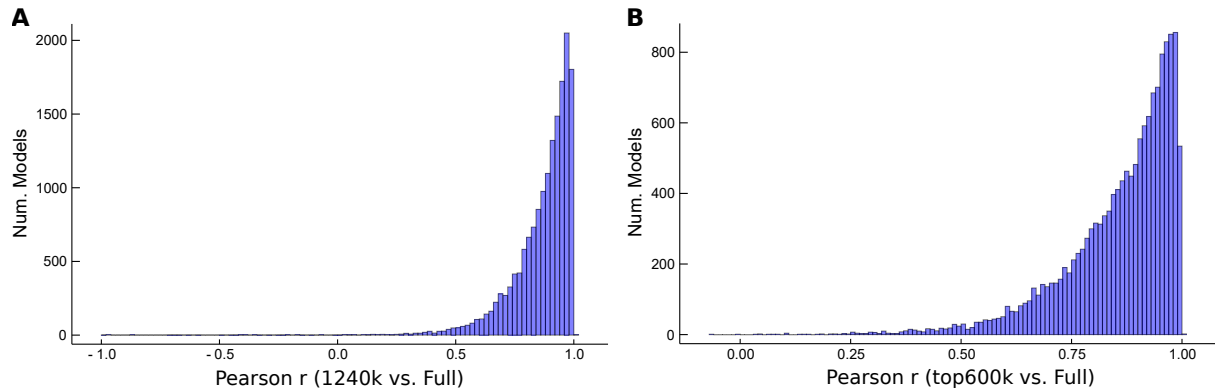

Figure 4: **Targeted models predict consistent gene regulatory patterns.** (a) Pearson r by model between Full model 1kG predictions and (a) 1240k and (b) top600k models for all genes in 4 tissues- Liver, Ovary, Whole Blood, Skeletal Muscle. Pearson correlation calculated for each model between predictions made on all 1kG individuals using Full models vs. 1240k or top600k models.

| Gene Set              | N Modeled | N in top 500 | OR [95% CI]         | Fisher's Exact <i>P</i> |
|-----------------------|-----------|--------------|---------------------|-------------------------|
| Stabilizing Selection | 4519      | 167          | 0.99 [0.53, 2.05]   | 1.0                     |
| Housekeeping          | 3127      | 130          | 1.33 [1.08, 1.64]   | 0.0076                  |
| LoF-Intolerant        | 2195      | 67           | 0.891 [0.675, 1.16] | 0.42                    |
| Virus Interacting     | 1022      | 37           | 1.0 [0.75, 1.53]    | 0.21                    |

Table 1: **Enrichment for four gene sets of interest in the 500 most diverged genes.** The odds ratio was calculated as the odds of a gene's presence in the category given it is in the top 500 divergently regulated genes. The analysis only includes genes that were both considered for inclusion in the set and had at least one PrediXcan model. For example, genes not tested for stabilizing selection on gene expression were not considered.

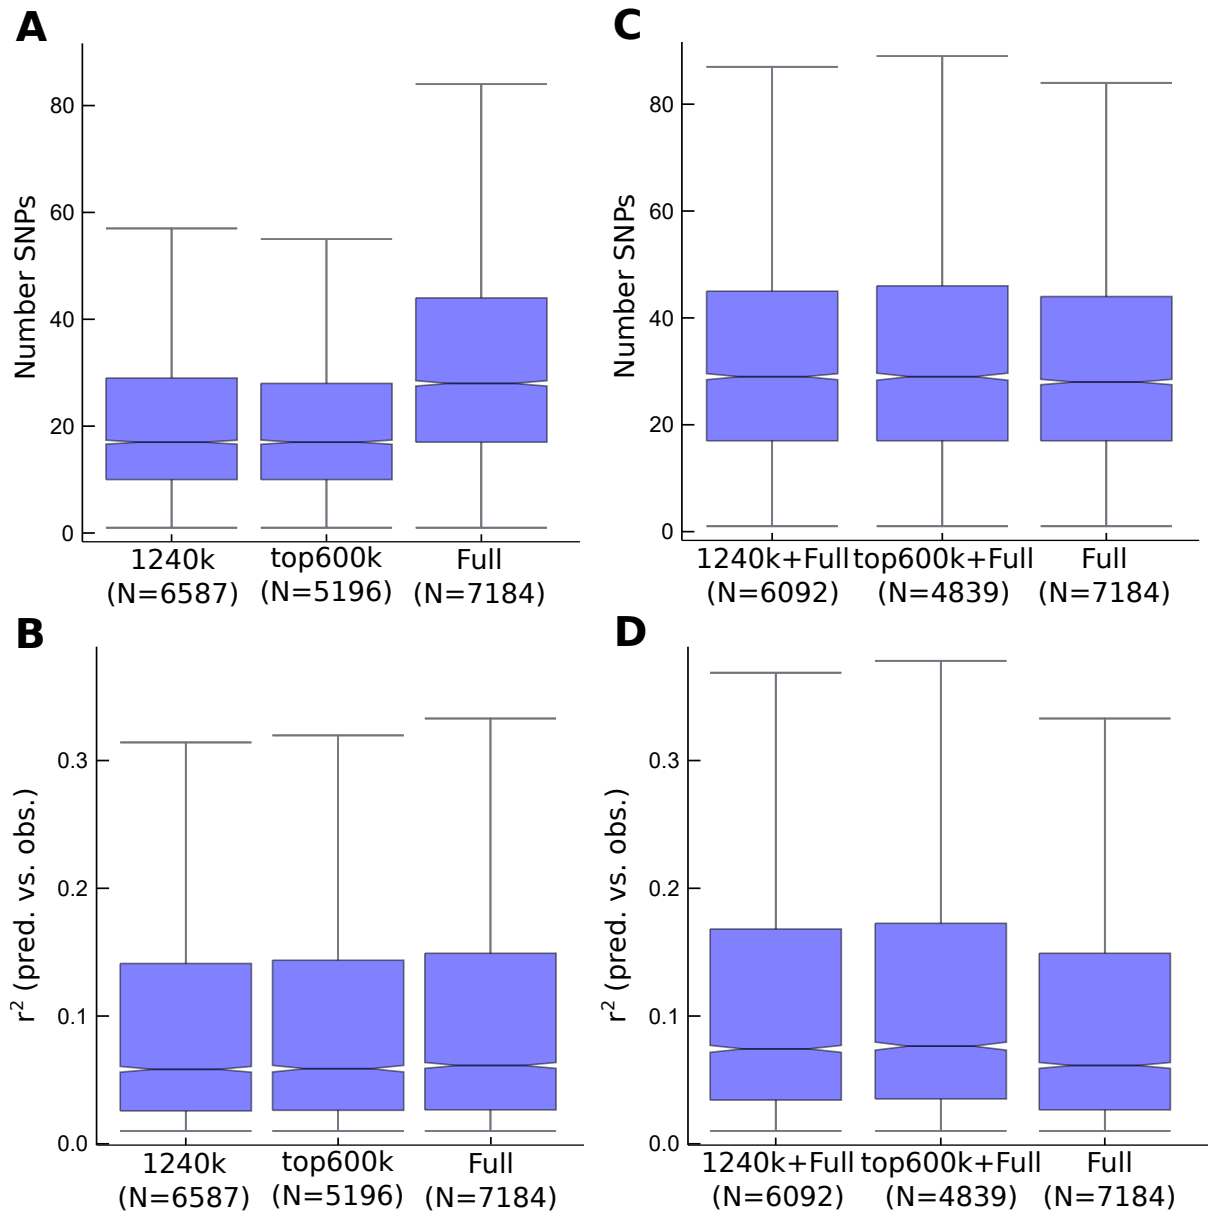

Figure 5: **Targeted models use fewer SNPs and succeed in modelling fewer genes.** (a) Number of SNPs in each set of models for Whole Blood. (b)  $r^2$  between predicted and observed expression for each model in Whole Blood. By definition, significant models had to have  $r^2 > 0.01$  and have a within-tissue FDR  $< 0.05$ . (c) Number of SNPs and (d)  $r^2$  in models shared (identified as significant) in both the Full set and either the 1240k or top600k Set (metrics plotted are those from the Full set). Full set replotted on all plots for comparison. Other tissues tested showed similar trends.

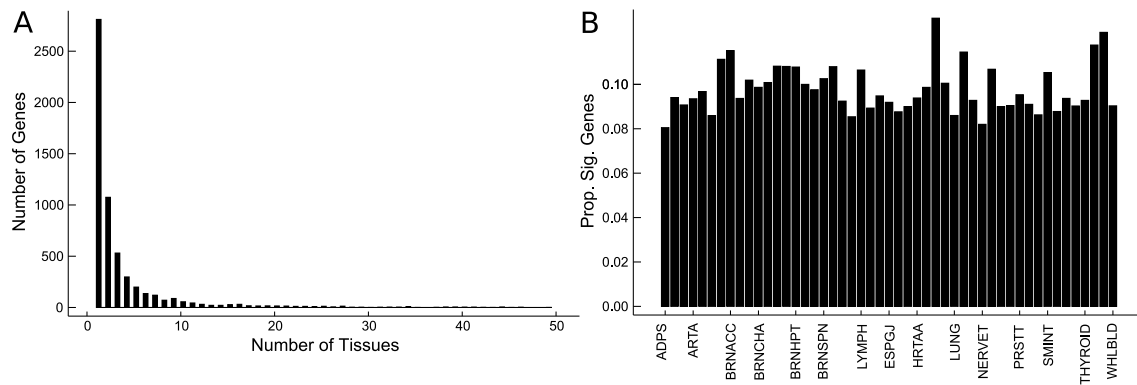

Figure 6: Thousands of genes are divergently regulated between lifestyle groups. (A) Distribution of the number of tissues in which each gene ( $N = 5760$ ) is significantly different between groups. (B) The proportion of significant models out of all models in a tissue. Tissues are in alphabetical order: **Adipose\_Subcutaneous**, Adipose\_Visceral\_Omentum, Adrenal\_Gland, **Artery\_Aorta**, Artery\_Coronary, Artery\_Tibial, Brain\_Amygdala, **Brain\_Anterior\_cingulate\_cortex**, Brain\_Caudate\_basal\_ganglia, Brain\_Cerebellar\_Hemisphere, **Brain\_Cerebellum**, Brain\_Cortex, Brain\_Frontal\_Cortex, Brain\_Hippocampus, **Brain\_Hypothalamus**, Brain\_Nucleus\_accumbens\_basal\_ganglia, Brain\_Putamen\_basal\_ganglia, **Brain\_Spinal\_cord\_cervical\_c-1**, Brain\_Substantia\_nigra, Breast\_Mammary\_Tissue, Cells\_Cultured\_fibroblasts, **Cells\_EBV-transformed\_lymphocytes**, Colon\_Sigmoid, Colon\_Transverse, **Esophagus\_Gastroesophageal\_Junction**, Esophagus\_Mucosa, Esophagus\_Muscularis, **Heart\_Atrial\_Appendage**, Heart\_Left\_Ventricle, Kidney\_Cortex, Liver, **Lung**, Minor\_Salivary\_Gland, Muscle\_Skeletal, Nerve\_Tibial, Ovary, Pancreas, Pituitary, **Prostate**, Skin\_Not\_Sun\_Exposed\_Suprapubic, Skin\_Sun\_Exposed\_Lower\_leg, **Small\_Intestine\_Terminal\_Ileum**, Spleen, Stomach, Testis, **Thyroid**, Uterus, Vagina, **Whole\_Blood**.

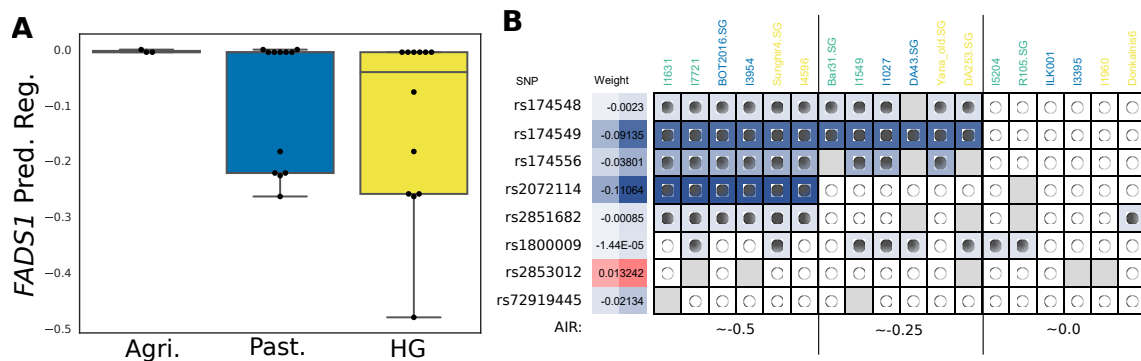

Figure 7: *FADS1* model variants tag a selected haplotype. (a) 27 ancient Africans follow a similar trend in expression differences to that seen in ancient Eurasian populations. (b) Breakdown of the 8 SNPs in the model of *FADS1* in Adipose\_Subcutaneous tissue and their presence in representative ancient Eurasians across a range of predicted normalized expression values. Cells are coloured by the weight that SNP contributed to the prediction, while the circles indicate the alleles present in that individual (filled = homozygous effect, empty = homozygous reference). A grey square indicates the SNP was ungenotyped in that individual. The vast majority of ancient samples appear homozygous due to being extremely low-coverage, such that many sites are represented by only a single read.

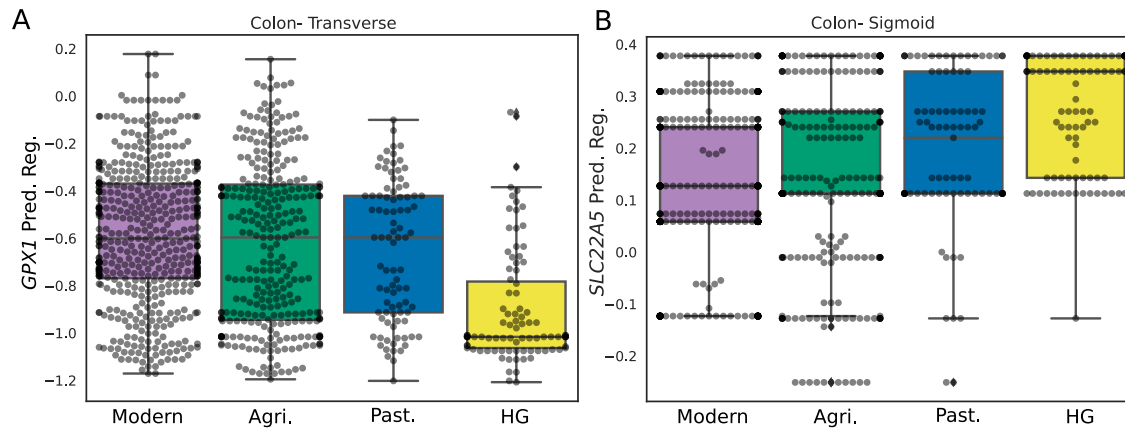

Figure 8: **Divergently regulated genes include** (A) *GPX1* in Transverse Colon and (B) *SLC22A5* in Sigmoid Colon. Plotted with 503 modern Europeans for comparison in purple. Green = Agriculturalists, Blue = Pastoralists, Yellow = Hunter-Gatherers.

| Tissue                                | Agri.  | Past.  | HG     | Corrected <i>P</i>    |
|---------------------------------------|--------|--------|--------|-----------------------|
| Adipose.Subcutaneous**                | -0.183 | -0.259 | -0.480 | $8.28 \times 10^{-6}$ |
| Adipose.Visceral.Omentum              | -0.132 | -0.158 | -0.158 | 0.0554                |
| Brain.Cerebellar.Hemisphere**         | -0.882 | -1.228 | -1.422 | $1.11 \times 10^{-4}$ |
| Brain.Cerebellum**                    | -0.887 | -1.184 | -1.716 | $5.76 \times 10^{-5}$ |
| Brain.Frontal.Cortex**                | -0.391 | -0.602 | -0.690 | $2.59 \times 10^{-9}$ |
| Brain.Putamen.basal.ganglia           | -0.360 | -0.469 | -0.530 | 0.0596                |
| Cells.Cultured.fibroblasts            | -0.712 | -0.768 | -1.024 | 0.0168                |
| Colon.Sigmoid**                       | -0.360 | -0.456 | -0.859 | $2.69 \times 10^{-5}$ |
| Esophagus.Gastroesophageal.Junction** | -0.378 | -0.426 | -0.579 | $3.06 \times 10^{-5}$ |
| Esophagus.Mucosa                      | -0.620 | -0.769 | -0.836 | $9.2 \times 10^{-3}$  |
| Esophagus.Muscularis                  | -0.319 | -0.409 | -0.506 | 0.117                 |
| Heart.Atrial.Appendage                | -0.225 | -0.281 | -0.382 | 0.016                 |
| Heart.Left.Ventricle**                | -0.169 | -0.330 | -0.924 | $2.53 \times 10^{-6}$ |
| Lung**                                | -0.106 | -0.154 | -0.237 | $4.2 \times 10^{-6}$  |
| Muscle.Skeletal**                     | -0.410 | -0.674 | -0.787 | $9.77 \times 10^{-7}$ |
| Nerve.Tibial                          | -0.560 | -0.748 | -0.868 | 0.0135                |
| Pancreas**                            | -0.452 | -0.882 | -1.414 | $1.6 \times 10^{-4}$  |
| Stomach**                             | -0.401 | -0.641 | -0.872 | $1.97 \times 10^{-6}$ |
| Testis**                              | -0.610 | -0.774 | -0.862 | $1.46 \times 10^{-3}$ |
| Thyroid**                             | -0.295 | -0.483 | -0.649 | $2.7 \times 10^{-5}$  |
| Whole.Blood                           | 0.0914 | 0.108  | 0.132  | 0.0759                |

Table 2: ***FADS1* models with divergent regulation by lifestyle.** Median predicted regulation for each group *P*-value is calculated from Kruskal-Wallis test, after GC-correction. *FADS1* was modeled in an additional 9 tissues. \*\*model *P*-value is below that corresponding to the top 500 unique genes.



| Model SNP rsID | Weight  | Haplotype | Tag SNP  | $r^2$ |
|----------------|---------|-----------|----------|-------|
| rs2072114      | -0.111  | B         | rs174546 | 0.340 |
| rs2072114      | -0.111  | C         | rs102274 | 0.329 |
| rs2072114      | -0.111  | D         | rs174576 | 0.421 |
| rs174549       | -0.0914 | B         | rs174546 | 0.918 |
| rs174549       | -0.0914 | C         | rs102274 | 0.892 |
| rs174549       | -0.0914 | D         | rs174576 | 0.673 |
| rs174556       | -0.0380 | B         | rs174546 | 0.914 |
| rs174556       | -0.0380 | C         | rs102274 | 0.889 |
| rs174556       | -0.0380 | D         | rs174576 | 0.675 |

Table 3: ***FADS1* model SNPs LD with established haplotype.** The 3 highest-weight SNPs from Subcutaneous Adipose. Haplotype labels correspond to those in Mathieson & Mathieson (2018) Mathieson and Mathieson (2018).

| Gene    | Tissue                                | Agri.  | Past.  | HG     | P       |
|---------|---------------------------------------|--------|--------|--------|---------|
| HFE     | Brain_Nucleus_accumbens_basal_ganglia | -0.538 | -0.426 | -0.280 | 0.0523  |
| TRIP4   | Brain_Cerebellar_Hemisphere           | -0.030 | -0.067 | -0.203 | 0.0458  |
|         | Brain_Frontal_Cortex                  | -0.046 | -0.053 | -0.098 | 0.0868  |
|         | Skin_Not_Sun_Exposed_Suprapubic       | -0.537 | -0.621 | -0.684 | 0.054   |
| FADS2   | Breast_Mammary_Tissue                 | -0.046 | 0.020  | 0.087  | 0.0332  |
|         | Esophagus_Muscularis                  | 0.255  | 0.416  | 0.454  | 0.0714  |
|         | Pancreas                              | 0.155  | 0.204  | 0.011  | 0.0187  |
|         | Skin_Not_Sun_Exposed_Suprapubic       | 0.239  | 0.266  | 0.266  | 0.0433  |
|         | Testis**                              | 0.414  | 0.457  | 0.459  | 2.49e-3 |
| SLC22A4 | Cells_Cultured_fibroblasts            | 0.304  | 0.360  | 0.304  | 0.0656  |
|         | Thyroid                               | -0.037 | -0.036 | -0.141 | 0.0329  |
| SLC22A5 | Adipose_Subcutaneous**                | 0.253  | 0.253  | 0.315  | 1.94e-3 |
|         | Adipose_Visceral_Omentum              | 0.054  | 0.054  | 0.054  | 0.0232  |
|         | Artery_Tibial                         | 0.602  | 0.736  | 0.746  | 0.0337  |
|         | Cells_Cultured_fibroblasts**          | 0.644  | 0.705  | 0.832  | 0.0019  |
|         | Cells_EBV-transformed_lymphocytes     | 0.182  | 0.326  | 0.366  | 0.00352 |
|         | Colon_Sigmoid**                       | 0.113  | 0.230  | 0.348  | 0.00324 |
|         | Esophagus_Gastroesophageal_Junction   | -0.139 | -0.039 | 0.174  | 0.00498 |
|         | Esophagus_Muscularis                  | 0.180  | 0.255  | 0.421  | 0.00413 |
|         | Minor_Salivary_Gland                  | 0.228  | 0.253  | 0.262  | 0.0935  |
|         | Nerve_Tibial                          | 0.655  | 0.688  | 0.781  | 0.0307  |
|         | Pancreas                              | -0.099 | -0.074 | 0.024  | 0.0112  |
|         | Thyroid                               | 0.320  | 0.385  | 0.398  | 0.0368  |
|         | Whole_Blood                           | 0.781  | 0.910  | 1.043  | 0.0115  |
| DI2     | Nerve_Tibial                          | -0.239 | -0.312 | -0.389 | 0.0644  |
| AS3MT   | Adipose_Visceral_Omentum              | -0.143 | -0.097 | -0.495 | 0.0738  |
|         | Brain_Hypothalamus                    | -0.328 | -0.206 | -0.688 | 0.0923  |
|         | Heart_Atrial_Appendage                | -0.243 | -0.046 | -0.449 | 0.0769  |
| GPX1    | Adrenal_Gland                         | -0.469 | -0.529 | -0.835 | 0.0105  |
|         | Cells_Cultured_fibroblasts            | -0.691 | -0.625 | -1.115 | 0.0199  |
|         | Colon_Transverse**                    | -0.597 | -0.597 | -1.016 | 0.00271 |
|         | Esophagus_Mucosa                      | -0.372 | -0.374 | -0.663 | 4.8e-3  |
|         | Prostate                              | -0.317 | -0.317 | -0.572 | 0.00541 |
|         | Skin_Not_Sun_Exposed_Suprapubic       | -0.379 | -0.432 | -0.712 | 0.00429 |
|         | Skin_Sun_Exposed_Lower_leg            | -0.475 | -0.444 | -0.741 | 0.00913 |
|         | Small_Intestine_Terminal_Ileum        | 0.054  | 0.054  | -0.100 | 0.0573  |
|         | Thyroid                               | -0.705 | -0.774 | -0.836 | 0.0335  |

Table 4: **Dietary gene models with divergent regulation by lifestyle.** Median predicted regulation for each group. *P*-value is calculated from Kruskal-Wallis test, after GC-correction. *FADS1* models in Table 2 also belong in this table, but are not reprinted to avoid redundancy. \*\*model *P*-value is below that corresponding to the top 500 unique genes.

| Tissue                                | Agri.   | Past.   | HG      | Corrected <i>P</i>    |
|---------------------------------------|---------|---------|---------|-----------------------|
| Adipose_Subcutaneous                  | -0.504  | -0.374  | -0.325  | 0.0151                |
| Adipose_Visceral_Omentum**            | -0.251  | -0.0661 | -0.0555 | $6.61 \times 10^{-4}$ |
| Brain_Cerebellar_Hemisphere**         | 0.00454 | 0.199   | 0.317   | $4.68 \times 10^{-4}$ |
| Brain_Cerebellum**                    | -0.191  | 0.0699  | 0.0395  | $2.54 \times 10^{-4}$ |
| Esophagus_Gastroesophageal_Junction** | -0.0109 | 0.0443  | 0.174   | $1.92 \times 10^{-3}$ |
| Heart_Atrial_Appendage**              | -0.136  | -0.0663 | -0.0537 | $4.48 \times 10^{-4}$ |
| Testis**                              | -0.246  | -0.0970 | -0.0659 | $4.8 \times 10^{-5}$  |
| Whole_Blood                           | 0.0559  | 0.211   | 0.178   | 0.0725                |

Table 5: **LEPR models with divergent regulation by lifestyle.** Median predicted regulation for each group *P*-value is calculated from Kruskal-Wallis test, after GC-correction. *LEPR* was modeled in an additional 11 tissues. \*\*model *P*-value is below that corresponding to the top 500 unique genes.

| GO term                                                  | Num. Genes | Enrichment | <i>P</i> |
|----------------------------------------------------------|------------|------------|----------|
| platelet morphogenesis                                   | 3          | 5.04       | 0.020    |
| response to mitochondrial depolarisation                 | 3          | 5.04       | 0.020    |
| protein hydroxylation                                    | 4          | 4.40       | 0.012    |
| peptidyl-proline modification                            | 6          | 4.18       | 0.0028   |
| oligosaccharide metabolic process                        | 5          | 3.86       | 0.0089   |
| response to interleukin-4                                | 4          | 3.69       | 0.022    |
| ruffle organization                                      | 5          | 3.25       | 0.018    |
| response to antineoplastic agent                         | 8          | 2.97       | 0.0053   |
| DNA-templated transcription, elongation                  | 8          | 2.72       | 0.0090   |
| cytokine metabolic process                               | 7          | 2.60       | 0.018    |
| type I interferon production                             | 8          | 2.51       | 0.014    |
| regulation of mitochondrion organization                 | 12         | 2.32       | 0.0057   |
| antigen processing and presentation                      | 11         | 2.30       | 0.0086   |
| regulation of inflammatory response                      | 22         | 2.10       | $8.6e-4$ |
| carbohydrate derivative catabolic process                | 11         | 2.07       | 0.018    |
| cellular modified amino acid metabolic process           | 12         | 2.07       | 0.014    |
| positive regulation of response to external stimulus     | 16         | 1.93       | 0.0092   |
| glycoprotein metabolic process                           | 20         | 1.83       | 0.0070   |
| positive regulation of cytokine production               | 20         | 1.72       | 0.012    |
| negative regulation of intracellular signal transduction | 24         | 1.63       | 0.013    |

Table 6: **Top 20 enriched GO terms among the 500 genes most diverged between lifestyles.**

| <b>Publication</b>                      | <b>Eur. LS</b> | <b>Afr. LS</b> | <b>Skin Pig.</b> | <b>DOI</b>                   |
|-----------------------------------------|----------------|----------------|------------------|------------------------------|
| AllentoftNature2015                     | 14             | 0              | 59               | 10.1038/nature14507          |
| AmorimNatureCommunications2018          | 0              | 0              | 63               | 10.1038/s41467-018-06024-4   |
| AntonioGaoMootsScience2019              | 69             | 0              | 131              | 10.1126/science.aay6826      |
| BraceDiekmannNatureEcologyEvolution2019 | 10             | 0              | 22               | 10.1038/s41559-019-0871-9    |
| BroushakiScience2016                    | 3              | 0              | 0                | 10.1126/science.aaf7943      |
| BrunelPNAS2020                          | 0              | 0              | 58               | 10.1073/pnas.1918034117      |
| CassidyNature2020                       | 0              | 0              | 44               | 10.1038/s41586-020-2378-6    |
| CassidyPNAS2016                         | 2              | 0              | 4                | 10.1073/pnas.1518445113      |
| DamgaardNature2018                      | 27             | 0              | 27               | 10.1038/s41586-018-0094-2    |
| DamgaardScience2018                     | 18             | 0              | 1                | 10.1126/science.aar7711      |
| EbenesersdottirScience2018              | 0              | 0              | 27               | 10.1126/science.aar2625      |
| FeldmanNatureCommunications2019         | 2              | 0              | 0                | 10.1126/sciadv.aax0061       |
| FernandesNatureEcologyEvolution2020     | 0              | 0              | 62               | 10.1038/s41559-020-1102-0    |
| FernandesScientificReports2018          | 7              | 0              | 17               | 10.1038/s41598-018-33067-w   |
| FernandesSirakNature2020                | 0              | 0              | 2                | 10.1038/s41586-020-03053-2   |
| FlegontovNature2019                     | 2              | 0              | 19               | 10.1038/s41586-019-1251-y    |
| FregelPNAS2018                          | 0              | 0              | 4                | 10.1073/pnas.1800851115      |
| FuNature2014                            | 1              | 0              | 0                | 10.0.4.14/nature13810        |
| FuNature2015                            | 0              | 0              | 1                | 10.1038/nature14558          |
| FuNature2016                            | 4              | 0              | 34               | 10.1038/nature17993          |
| FurtwanglerNatureCommunications2020     | 0              | 0              | 96               | 10.1038/s41467-020-15560-x   |
| GambaNatureCommunications2014           | 4              | 0              | 3                | 10.1038/ncomms6257           |
| GonzalesFortesCurrentBiology2017        | 2              | 0              | 6                | 10.1016/j.cub.2017.05.023    |
| GonzalesFortesProcRoyalSocB2019         | 0              | 0              | 4                | 10.1098/rspb.2018.2288       |
| GuntherPLoS Biology2018                 | 4              | 0              | 7                | 10.1371/journal.pbio.2003703 |
| GuntherPNAS2015                         | 3              | 0              | 5                | 10.1073/pnas.1509851112      |
| HaberAJHG2017                           | 3              | 0              | 0                | 10.1016/j.ajhg.2017.06.013   |
| HofmanovaPNAS2016                       | 4              | 0              | 3                | 10.1073/pnas.1523951113      |
| JarveCurrentBiology2019                 | 0              | 0              | 258              | 10.1016/j.cub.2019.06.019    |
| JeongNatureEcologyEvolution2019         | 1              | 0              | 0                | 10.1038/s41559-019-0878-2    |
| JeongPNAS2018                           | 3              | 0              | 0                | 10.1073/pnas.1813608115      |
| JonesCurrentBiology2017                 | 1              | 0              | 3                | 10.1016/j.cub.2016.12.060    |
| JonesNatureCommunications2015           | 3              | 0              | 1                | 10.1038/ncomms9912           |
| KellerNatureCommunications2012          | 0              | 0              | 1                | 10.1038/ncomms1701           |
| KilincCurrentBiology2016                | 1              | 0              | 0                | 10.1016/j.cub.2016.07.057    |
| KrzewinskaCurrentBiology2018            | 6              | 0              | 23               | 10.1016/j.cub.2018.06.053    |
| KrzewinskaScienceAdvances2018           | 3              | 0              | 35               | 10.1126/sciadv.aat4457       |
| LamnidisNatureCommunications2018        | 0              | 0              | 15               | 10.1038/s41467-018-07483-5   |
| LazaridisNature2014                     | 3              | 0              | 2                | 10.1038/nature13673          |

| Publication                             | Eur. LS | Afr. LS | Skin Pig. | DOI                                                                     |
|-----------------------------------------|---------|---------|-----------|-------------------------------------------------------------------------|
| LazaridisNature2016                     | 8       | 0       | 0         | 10.1038/nature19310                                                     |
| LazaridisNature2017                     | 3       | 0       | 16        | 10.1038/nature23310                                                     |
| LinderholmNatureScientificReports2020   | 0       | 0       | 19        | 10.1038/s41598-020-63138-w                                              |
| LipsonNature2017                        | 16      | 0       | 135       | 10.1038/nature24476                                                     |
| LipsonNature2020                        | 0       | 6       | 0         | 10.1038/s41586-020-1929-1                                               |
| MalmstromProcBiolSci2019                | 3       | 0       | 11        | 10.1098/rspb.2019.1528                                                  |
| MarcusNatureCommunications2020          | 0       | 0       | 70        | 10.1038/s41467-020-14523-6                                              |
| MargaryanWillerslevNature2020           | 0       | 0       | 414       | 10.1038/s41586-020-2688-8                                               |
| MartinianoNatureCommunications2016      | 5       | 0       | 9         | <a href="http://10.0.4.14/ncomms10326">http://10.0.4.14/ncomms10326</a> |
| MartinianoPLoSGenetics2017              | 0       | 0       | 14        | 10.1371/journal.pgen.1006852                                            |
| MathiesonNature2015                     | 44      | 0       | 67        | 10.1038/nature16152                                                     |
| MathiesonNature2018                     | 52      | 0       | 219       | 10.1101/135616                                                          |
| McCollScience2018                       | 1       | 0       | 0         | 10.1126/science.aat3628                                                 |
| MitnikNatureCommunications2018          | 6       | 0       | 37        | 10.1038/s41467-018-02825-9                                              |
| MitnikScience2019                       | 2       | 0       | 89        | 10.1126/science.aax6219                                                 |
| NarasimhanPattersonScience2019          | 69      | 0       | 29        | 10.1126/science.aat7487                                                 |
| NikitinScientificReports2019            | 0       | 0       | 2         | 10.1038/s41598-019-56029-2                                              |
| OlaldeNature2014                        | 1       | 0       | 0         | 10.0.4.14/nature12960                                                   |
| OlaldeMBE2015                           | 0       | 0       | 1         | 10.1093/molbev/msv181                                                   |
| OlaldeNature2018                        | 43      | 0       | 388       | 10.1038/nature25738                                                     |
| OlaldeScience2019                       | 4       | 0       | 275       | 10.1126/science.aav4040                                                 |
| PrendergastLipsonSawchukScience2019     | 0       | 10      | 0         | 10.1126/science.aaw6275                                                 |
| Pruefer2017                             | 2       | 0       | 0         | 10.1126/science.aao1887                                                 |
| RivollatScienceAdvance2020              | 0       | 0       | 101       | 10.1126/sciadv.aaz5344                                                  |
| SaagCurrentBiology2017                  | 2       | 0       | 7         | 10.1016/j.cub.2017.06.022                                               |
| SaagCurrentBiology2019                  | 0       | 0       | 43        | 10.1016/j.cub.2019.04.026                                               |
| SanchezQuintoPNAS2019                   | 6       | 0       | 23        | 10.1073/pnas.1818037116                                                 |
| SchiffelsNatureCommunications           | 7       | 0       | 10        | 10.1038/ncomms10408                                                     |
| SchlebuschScience2017                   | 0       | 4       | 0         | 10.1126/science.aao6266                                                 |
| SchroederPNAS2019                       | 0       | 0       | 24        | 10.1073/pnas.1820210116                                                 |
| Seguin-OrlandoScience2014               | 1       | 0       | 0         | 10.1126/science.aaa0114                                                 |
| SikoraNature2019                        | 5       | 0       | 9         | 10.1038/s41586-019-1279-z                                               |
| SikoraScience2017                       | 5       | 0       | 5         | 10.1126/science.aao1807                                                 |
| SkoglundScience2014                     | 1       | 0       | 11        | 10.1126/science.1253448                                                 |
| SkoglundCell2017                        | 0       | 3       | 0         | 10.1016/j.cell.2017.08.049                                              |
| SullivanScienceAdvances2018             | 0       | 0       | 8         | 10.1126/sciadv.aao1262                                                  |
| TeschlerNicolaCommunicationsBiology2020 | 0       | 0       | 2         | 10.1038/s42003-020-01372-8                                              |
| UnterlanderNatureCommunications2017     | 2       | 0       | 2         | 10.1038/ncomms14615                                                     |
| ValdioseraPNAS2018                      | 3       | 0       | 11        | 10.1073/pnas.1717762115                                                 |
| vandeLoosdrechtScience2018              | 0       | 4       | 0         | 10.1126/science.aar8380                                                 |

| Publication                     | Eur. LS | Afr. LS | Skin Pig. | DOI                        |
|---------------------------------|---------|---------|-----------|----------------------------|
| VeeramahPNAS2018                | 0       | 0       | 40        | 10.1073/pnas.1719880115    |
| VillalbaMoucoCurrentBiology2019 | 1       | 0       | 10        | 10.1016/j.cub.2019.02.006  |
| WangNatureCommunications2019    | 3       | 0       | 47        | 10.1038/s41467-018-08220-8 |
| ZallouaScientificReports2018    | 0       | 0       | 1         | 10.1038/s41598-018-35667-y |

Table 7: **Original publications for samples used in each analysis.** Publications are identified by First author name, year, and journal, with the doi provided. Also given are the number of samples from that publication used in each analysis (Eurasian Lifestyle, African *FADS1* Lifestyle, Skin Pigmentation). Specific samples used can be found in Supplemental File S1
